# **Differential distribution of Neandertal genomic signatures in human mitochondrial haplogroups**

Renata C. Ferreira\*<sup>1</sup>, Camila R. Rodrigues\*<sup>2</sup>, James R. Broach<sup>4</sup> and Marcelo R. S. Briones<sup>3</sup>

Department of Neurology<sup>1</sup>, Department of Microbiology, Immunology and Parasitology<sup>2</sup>, Department of Health Informatics<sup>3</sup>, Federal University of São Paulo, São Paulo, SP, Brazil, CEP 04039032;

Institute for Personalized Medicine<sup>4</sup>, Department of Biochemistry, Pennsylvania State University College of Medicine, 500 University Drive, 17033, Hershey PA, USA.

\*Both share first author status

Corresponding author:

Marcelo R. S. Briones

Escola Paulista de Medicina – UNIFESP

Edifício de Pesquisas II, L4E

CEP 04039-032 São Paulo SP Brazil

Tel: +55 11 5576-4537

E-mail: marcelo.briones@unifesp.br

## Abstract

Genetic contributions of Neandertals to the modern human genome have been evidenced by comparative analyses of present day human genomes and paleogenomes. The Neandertal introgression differs in European, East Asian and African lines of descent, and is higher in Asians and Europeans and lower in Africans. Neandertal signatures in extant human genomes are attributed to intercrosses between Neandertals and ancient *Homo sapiens* lineages, or Anatomically Modern Humans (AMH) that migrated from Africa into the Middle East and Europe in the last 50,000 years. It has been proposed however that there is no contribution of Neandertal mitochondrial DNA to contemporary human genomes. Here we show that the modern human mitochondrial genome contains 75 Neandertal signatures of which 11 are associated with diseases such as cycling vomiting syndrome and depression and 3 associated with intelligence quotient. Principal component analysis and bootscan tests suggest rare recombination events. Also, contrary to what is observed in the nuclear genome, African mitochondrial haplogroups have more Neandertal signatures than Asian and European haplogroups. Our results suggest that although most intercrosses occurred between Neandertal males and Anatomically Modern Humans (AMH) females, crosses between AMH males and Neandertal females were extremely rare with also rare recombination events thus leaving few marks (75 out of 16,565bp) in present day mitochondrial genomes of human populations.

**Keywords:** Mitochondrial genome, Human evolution, Neandertal intercrosses. Mitochondrial recombination, Mitochondrial haplogroups.

Neandertal genetic contributions to the modern makeup of the human genome have been evidenced by comparative analyses of present day human genomes and paleogenomes (1–4). These contributions are differential in European, East Asian and African lines of descent, with a higher frequency of Neandertal segments in Asians and Europeans and lower frequencies in Africans (1). The presence of Neandertal signatures in extant human genomes are attributed to intercrosses between Neandertals and ancient *Homo sapiens* lineages, or Anatomically Modern Humans (AMH) that migrated from Africa into the Middle East and Europe in the last 50,000 years (2, 3). The spatio-temporal overlap of Neandertals and AMH is estimated to be approximately 22,000 years since the first AMH arrived in Europe around 50,000 years ago and the last Neandertal remains (in Spain) date back to 28,000 years (5, 6). It has been proposed however that there is no contribution of Neandertal mitochondrial DNA to contemporary human genomes (7). Because of mtDNA matrilineal inheritance this implies that the all intercrosses occurred between Neandertal males and AMH females. Another possibility is that crosses between AMH males and Neandertal females were either extremely rare or yet, produced such unfavorable traits, via mitonuclear incompatibility (8), that none of its descendants left marks in present day human populations.

To investigate the proposed absence of Neandertal mitochondrial contribution in extant humans we compared mitochondrial genomes of extant human mitochondrial haplogroups, ancient AMH *Homo sapiens* and Neandertals. The whole mitochondrial genome alignment dataset revealed 918 polymorphic positions within the 16,565bp mtDNA. Within these 918 positions, 75 contained variants that were identical between present day humans and Neandertals at the exclusion of ancient AMH (Fig. 1). There are 175 positions in which 1 or more Neandertals are different from all other sequences. In 4 positions the modern humans are identical to Neandertals although there are 1 or 2 Ancient *H. sapiens* positions identical to Neandertals. There are 11 positions in which 1 or more Ancient *H. sapiens* are different from all other sequences. There are 10 positions in which 1 to 3 Ancient *H. sapiens* are identical several modern humans.

Single position cladograms of five representative polymorphic positions depict this pattern, which represents 10% of all polymorphic positions in the human mitochondrial genome. Here we show the pattern of position 2,706 (12S rRNA) (Fig. 1). The patterns of positions 1,018 (12S rRNA gene), 3,010 (16S rRNA gene), 3,594 (NADH dehydrogenase 1 - *ND1*), 5,460 (NADH dehydrogenase 2 – *ND2*) and 16,519 in D-loop are in the Supplementary data (figs. S1-S5). It has been reported that mtDNA positions 3,010 and 5,460 contains a G to A transition associated with Cyclic Vomiting Syndrome (9–11) and Alzheimer's & Parkinson's Diseases (12, 13) respectively (Table 1). It can be observed that the distribution of the clusters of modern human haplogroups with Neandertals vary among human haplogroups (Fig. 1).

Haplogroup L3 is more related to Eurasian haplogroups than to the most divergent African clusters L1 and L2" (14). L3 is the haplogroup from which all modern humans outside of Africa derive. The distribution of Neandertal specific signatures along the mitochondrial genome is compiled in Fig. 2. Columns represent each individual gene and rows correspond to mitochondrial haplogroups. Intergenic regions, at the exception of the Control Region, or D-loop, are not depicted because they are virtually absent in the human mitochondrial genome. Apart from the D-loop there is only one intergenic region, a 24bp segment between the end of *COX2* and start of tRNA-Lys. This analysis reveals that the Neandertal specific signatures are more frequent in the African haplogroups (L0, L1, L2, L3, L4, L5 and L6), then South East Asians, Native Australians (M), Native Americans (C) and lastly in Europeans (U, X, W, K and H). Unexpectedly this pattern is the opposite as observed in the nuclear genomes. The Neandertal signatures are more frequent in the highly divergent D-loop and among coding regions, in NADH dehydrogenase subunit 4 (*ND4*) and Cytochrome B (*CYTB*) (Fig. 2). The 3' half of the genome contains significantly more Neandertal signatures than the 5' half. The central region of the mtDNA corresponds to a breakage-repair point where deletions occur (15). Therefore this is Neandertal signature 2706G shared with modern European haplogroups U5a7a2, H1a1, H3, H15 and H2a2a1 (rCRS) but not with any of the Ancient *H. sapiens* sequences or the other modern haplogroups here analyzed.

Principal component analysis (PCA) of the whole mitochondrial genome shows four clusters: (1) the modern haplogroups including the ancient *H. sapiens* (table S2), (2) the L

haplogroup cluster, (3) the Neandertal Altai-Mezmaskaya L-like cluster (table S3) and (4) the Neandertal group (Fig. 3). However the PCA of segment corresponding to the ribosomal RNA gene proximal half produces a pattern that approximates the L haplogroup cluster to the Neandertal Altai-Mezmaskaya L-like cluster suggesting the introgression point. The PCA of ribosomal RNA gene distal half suggests an opposite pattern with L cluster closer to Neandertal although not as close as shown in Fig. 3B.

Several Neandertal signatures are associated with disease and in particular the 15,043 G>A transition associated with major depression, a trait associated with Neandertal introgression in modern humans (16) (Table 1). Five Neandertal signatures correspond to SNPs associated with cycling vomiting syndrome with migraine, a condition known for its maternal inheritance (17) although never associated with Neandertal introgression (2) (Table 1). Also, among 21 SNPs belonging to the *MspI* mutation associated with Caucasians (18) three are Neandertal signatures (table S4). These mitochondrial genome SNPs have been associated with variation in intelligence quotient (IQ) in positions 16,189, 16,278 and 16,298 and are the same SNPs found in Neandertals (table S4).

It can be argued that the Neandertal signatures are in fact character states conserved since the last common ancestor of Neandertals and present day *Homo sapiens* (e.g. *Homo erectus*) but this would not be consistent with the absence of these signatures in ancient *H. sapiens* mitochondrial genomes (Fig. 1). Alternatively, the Neandertal signatures here described could be a consequence of random events. Because the random chance of the same nucleotide in a given position is 0.25 and there are 918 polymorphic positions in which 75 are Neandertal specific, it would roughly fit the 0.08 chance expectation. However, the chance that the 75 positions are simultaneously identical by chance alone would be roughly  $0.25^{75}$  which is far less than observed here.

A back to Africa hypothesis has been proposed in which humans from Eurasia returned to Africa and impacted a wide range of sub-Saharan populations (19). Our data shows that Neandertal signatures are present in all major African haplogroups thus confirming that the Back to Africa contribution to the modern mitochondrial African pool was extensive.

Our observations suggest that crosses between AMH males and Neandertal females left significantly less descendants than the reverse crosses (Neandertal males and AMH females), which seems to be the dominant pattern. Although it is generally accepted that recombination does not occur in the human mitochondrial genome there is a controversy over reported evidence on mitochondrial recombination (20, 21). A scenario with complete absence of recombination presents a problem to explain how the human mitochondrial genome would escape the Miller ratchet and therefore avoiding its predicted “genetic meltdown” (22). It has been shown that even minimal recombination is sufficient to allow the escape from the Miller ratchet (23) and this could be the case of the human mitochondrial genome. We tested potential recombination in our dataset using bootscan (fig. S6). The bootscan analysis indicates that there are potential recombination points. Upon deeper analysis we observed that bootscan considers the Neandertal specific signatures, such as in L haplogroups, as recombination points. Although the bootscan putative recombination segments are above the bootstrap threshold we do not consider this as definitive evidence of recombination since the segments between the Neandertal signatures are almost identical. Bootscan analysis did exclude Human-Neandertal recombination in rCRS sequence (fig. S7). Sensitivity of bootscan to substitution models and alignment methods was assessed by comparing the same set query-parentals with different parameters (fig. S8), revealing minor profile alterations. The alignment parameters are not so critical in this case because the sequences are extremely conserved (918 polymorphic positions in 16,565bp). Although indels are present in the alignments, 99% are located near the H promoter in the D-loop region. These are automatically excluded in phylogeny inference algorithms and therefore have no weight in bootscan results. The “positional homology” is therefore solid, particularly in coding domains and regions without repeats in non-coding domains. The Neandertal signatures are in unambiguously aligned segments.

Our data is compatible with a scenario in which the AMH-Neandertal crosses occur in Europeans, East Asians and African lines of descent. However, in the African haplogroups the crosses between AMH males and Neandertal females would have a higher frequency than in European lines of descent, where the reverse crosses would be predominant. Based on the comparison of Neandertal signatures in nuclear and mitochondrial genome haplogroups we hypothesize that the African lines of descent would have a higher female Neandertal contribution

whereas European lines of descent would have higher male Neandertal contribution. The fact that AMH and Neandertals crossed and produced fertile descendants is evidence that they belong to the same species (4) and thus indicate that *Homo sapiens* emerged independently in Africa, Europe and Asia (24). The intercrosses of these three *Homo sapiens* subgroups, and other even deeper ancestors such as Denisovans, in its different proportions and specific signatures, produced the extant human genomes.

Analyses presented here suggest that Neandertal genomic signatures might have been a product of rare mtDNA recombination events. Although there is evidence supporting mtDNA recombination its weight in phylogenies remain controversial. Some authors contend that due to its high mutation rate reverse compensatory mutations can be confounded with recombination in mtDNA. Our data supports a mtDNA recombination scenario in which recombination events are extremely rare thus producing a small number of Neandertal signatures.

## Materials and Methods

Comparative analysis of the mitochondrial DNA from present day humans, ancient *Homo sapiens* and Neandertals, 52 sequences of modern human mtDNA, representing all major mitochondrial haplogroups (table S1), were selected from the PhyloTREE database (25) and downloaded from GenBank. Six ancient *H. sapiens* mtDNA and eight Neandertal mtDNA sequences were downloaded from GenBank (tables S1-S3). The Ust-Ishim sequence was assembled using reads downloaded from Study PRJEB6622 at the European Nucleotide Archive (EMBL-EBI) and assembled using the CLC Genomics Workbench 7 program (<https://www.qiagenbioinformatics.com>). To maintain the reference numbering, sequences were aligned to the revised Cambridge Reference Sequence (rRCS; GenBank accession number NC012920) (26), totalizing 68 sequences using the map to reference option implemented in Geneious 10 program (27). Variants were called using Geneious 10 program. A total of 918 polymorphic positions were found. From this, 75 were present in both Neandertals and present day human and 4 in Neandertals, ancient and modern humans. 175 polymorphic positions were exclusive to Neandertal sequences and 11 were present only in ancient human sequences. The remaining changes were present only in modern humans. Variants present in either Neandertals

and modern humans or Neandertals, ancient and modern humans (79 positions) were screened for disease associations at MitoMap (<http://www.mitomap.org/MITOMAP>) (28).

Position specific similarities between modern haplogroups and Neandertals were depicted by cladograms for each of the single 75 variant positions present only in Neandertals and modern humans and excluding Ancient *H. sapiens*, were generated using parsimony heuristic search implemented in PAUP v4.1a152 with the default parameters (29). Proximity of mitochondrial haplogroups in Ancient *H. sapiens* and Neandertals were inferred using Haplogrep 2.1.0 (30).

Potential recombination between Neandertals and ancient *H. sapiens* sequences was inferred by a phylogenetic based method implemented by manual bootscan in the Recombination Detection Program (RDP) v.4.87. Parameters for bootscan analysis were: window size = 200; step size = 20; bootstrap replicates = 1,000; cutoff percentage = 70; use neighbor joining trees; calculate binomial p-value; model option = Kimura 1980 (31). For each analysis, a single alignment was created which included the modern haplogroup, all 9 Neandertal and all 6 Ancient *H. sapiens* sequences. When rCRS was used as query, two sets of possible parental sequences were selected: either Neandertals Mezmaiskaya and Altai and ancient *H. sapiens* Fumane and Ust Ishim or only Neandertals Feldhofer1, Mezmaiskaya and Vindija 33.16. For haplogroups L0d1a and L3d3b possible parental sequences were Neandertals Feldhofer1, Mezmaiskaya and Vindija 33.16 and Ancient *H. sapiens* Kostenki 14, Fumane, Doni Vestonice 14 and Tianyuan. For haplogroups M29a and R0a possible parental sequences were Neandertals Mezmaiskaya and Altai and Ancient *H. sapiens* Kostenki 14 and Doni Vestonice 14. For haplogroup N1b1a3 possible parental sequences were Neandertals Feldhofer1 and Vindija 33.16 and Ancient *H. sapiens* Kostenki 14 and Doni Vestonice 14.

Variants calling and Principal Component Analysis of mitogenomes. Three different datasets were used for the variant calling: (1) the whole mitogenome from the 68 sequences alignment; (2) the 128 to 315bp fragment and (3) the 6,950 to 7,660 fragment of the same alignment. All fasta alignments were processed using the MSA2VCF software to generate the VCF files (32). The options used on msa2vcf were: --haploid --output. To convert the VCF files to Plink format we used the vcftools package (33). Whole mitogenome alignment with 68



sequences had 785 SNPs (positions containing gaps in at least one sequence were excluded from the analysis). Both 128 – 315 and 6,950-7,660 fragments had 24 SNPs.

Principal component analysis was performed using the PLINK software v1.90b4 (34). PCA figure plotting was made using Genesis PCA and admixture plot viewer (<http://www.bioinf.wits.ac.za/software/genesis/>). The first two principal components were chosen for the Neandertal - *H. sapiens* comparison.

## Acknowledgements

The authors thank Prof. Dajiang Liu (Dept. Public Health Sciences, Penn State College of Medicine) and Prof. Rongling Wu (Center for Statistical Genetics, Penn State University) for critical reading of the manuscript. This work was supported by grants to M.R.S.B. from FAPESP, Brazil (2013/07838-0 and 2014/25602-6) and CNPq, Brazil (303905/2013-1). R.C.F received a CNPq postdoctoral fellowship (206445/2014-8) and C.R.R. a CAPES (Brazil) MSc fellowship.

## References

1. R. E. Green *et al.*, A Draft Sequence of the Neandertal Genome. *Science*. **328**, 710–722 (2010).
2. C. N. Simonti *et al.*, The phenotypic legacy of admixture between modern humans and Neandertals. *Science*. **351**, 737–741 (2016).
3. K. Prüfer *et al.*, The complete genome sequence of a Neandertal from the Altai Mountains. *Nature*. **505**, 43–49 (2014).
4. K. H. Ko, Hominin interbreeding and the evolution of human variation. *J Biol Res (Thessalon)*. **23** (2016), doi:10.1186/s40709-016-0054-7.
5. A. Gibbons, Close Encounters of the Prehistoric Kind. *Science*. **328**, 680–684 (2010).
6. T. Higham *et al.*, The timing and spatiotemporal patterning of Neandertal disappearance. *Nature*. **512**, 306–309 (2014).

7. D. Serre *et al.*, No Evidence of Neandertal mtDNA Contribution to Early Modern Humans. *PLoS Biol.* **2** (2004), doi:10.1371/journal.pbio.0020057.
8. G. E. Hill, J. D. Johnson, The mitonuclear compatibility hypothesis of sexual selection. *Proc Biol Sci.* **280** (2013), doi:10.1098/rspb.2013.1314.
9. R. G. Boles *et al.*, Are pediatric and adult-onset cyclic vomiting syndrome (CVS) biologically different conditions? Relationship of adult-onset CVS with the migraine and pediatric CVS-associated common mtDNA polymorphisms 16519T and 3010A. *Neurogastroenterology & Motility.* **21**, 936-e72 (2009).
10. T. Venkatesan *et al.*, Quantitative pedigree analysis and mitochondrial DNA sequence variants in adults with cyclic vomiting syndrome. *BMC Gastroenterol.* **14**, 181 (2014).
11. E. Zaki *et al.*, Two Common Mitochondrial DNA Polymorphisms are Highly Associated with Migraine Headache and Cyclic Vomiting Syndrome. *Cephalalgia.* **29**, 719–728 (2009).
12. A. L. Mitchell, J. L. Elson, N. Howell, R. W. Taylor, D. M. Turnbull, Sequence variation in mitochondrial complex I genes: mutation or polymorphism? *J Med Genet.* **43**, 175–179 (2006).
13. R. Saxena *et al.*, Comprehensive Association Testing of Common Mitochondrial DNA Variation in Metabolic Disease. *The American Journal of Human Genetics.* **79**, 54–61 (2006).
14. N. Maca-Meyer, A. M. González, J. M. Larruga, C. Flores, V. M. Cabrera, Major genomic mitochondrial lineages delineate early human expansions. *BMC Genet.* **2**, 13 (2001).
15. S. K. Bharti *et al.*, DNA Sequences Proximal to Human Mitochondrial DNA Deletion Breakpoints Prevalent in Human Disease Form G-quadruplexes, a Class of DNA Structures Inefficiently Unwound by the Mitochondrial Replicative Twinkle Helicase. *J. Biol. Chem.* **289**, 29975–29993 (2014).
16. A. Gibbons Feb. 11, 2016, 2:00 Pm, Our hidden Neandertal DNA may increase risk of allergies, depression. *Science / AAAS* (2016), (available at <http://www.sciencemag.org/news/2016/02/our-hidden-neandertal-dna-may-increase-risk-allergies-depression>).
17. R. G. Boles, K. Adams, B. U. K. Li, Maternal inheritance in cyclic vomiting syndrome. *Am. J. Med. Genet. A.* **133A**, 71–77 (2005).
18. M. J. Johnson, D. C. Wallace, S. D. Ferris, M. C. Rattazzi, L. L. Cavalli-Sforza, Radiation of human mitochondria DNA types analyzed by restriction endonuclease cleavage patterns. *J. Mol. Evol.* **19**, 255–271 (1983).

19. B. M. Henn *et al.*, Genomic Ancestry of North Africans Supports Back-to-Africa Migrations. *PLOS Genetics*. **8**, e1002397 (2012).
20. M. Schwartz, J. Vissing, Paternal Inheritance of Mitochondrial DNA. *New England Journal of Medicine*. **347**, 576–580 (2002).
21. Y. Kraytsberg *et al.*, Recombination of Human Mitochondrial DNA. *Science*. **304**, 981–981 (2004).
22. J. Felsenstein, The Evolutionary Advantage of Recombination. *Genetics*. **78**, 737–756 (1974).
23. E. Dokianakis, E. D. Ladoukakis, Different degree of paternal mtDNA leakage between male and female progeny in interspecific *Drosophila* crosses. *Ecol Evol*. **4**, 2633–2641 (2014).
24. S. Horai, K. Hayasaka, R. Kondo, K. Tsugane, N. Takahata, Recent African origin of modern humans revealed by complete sequences of hominoid mitochondrial DNAs. *PNAS*. **92**, 532–536 (1995).
25. M. van Oven, M. Kayser, Updated comprehensive phylogenetic tree of global human mitochondrial DNA variation. *Hum. Mutat*. **30**, E386–E394 (2009).
26. R. M. Andrews *et al.*, Reanalysis and revision of the Cambridge reference sequence for human mitochondrial DNA. *Nature Genetics*. **23**, 147–147 (1999).
27. M. Kearse *et al.*, Geneious Basic: an integrated and extendable desktop software platform for the organization and analysis of sequence data. *Bioinformatics*. **28**, 1647–1649 (2012).
28. M. T. Lott *et al.*, MtDNA Variation and Analysis Using Mitomap and Mitomaster. *Curr Protoc Bioinformatics*. **44**: 1.23.1-26 (2013) doi:10.1002/0471250953.bi0123s44.
29. D. Swofford, *PAUP: Phylogenetic Analysis Using Parsimony* (2014); (<http://paup.csit.fsu.edu/>).
30. H. Weissensteiner *et al.*, HaploGrep 2: mitochondrial haplogroup classification in the era of high-throughput sequencing. *Nucleic Acids Res*. **44**, W58–W63 (2016).
31. M. Kimura, A simple method for estimating evolutionary rates of base substitutions through comparative studies of nucleotide sequences. *J. Mol. Evol*. **16**, 111–120 (1980).
32. P. Lindenbaum, Jvarkit: java-based utilities for Bioinformatics (2015) (available at [https://figshare.com/articles/Jvarkit\\_java\\_based\\_utilities\\_for\\_Bioinformatics/1425030](https://figshare.com/articles/Jvarkit_java_based_utilities_for_Bioinformatics/1425030)).
33. P. Danecek *et al.*, The variant call format and VCFtools. *Bioinformatics*. **27**, 2156–2158 (2011).

34. S. Purcell *et al.*, PLINK: a tool set for whole-genome association and population-based linkage analyses. *Am. J. Hum. Genet.* **81**, 559–575 (2007).
35. M. Hervella *et al.*, The mitogenome of a 35,000-year-old Homo sapiens from Europe supports a Palaeolithic back-migration to Africa. *Scientific Reports.* **6**, 25501 (2016).
36. Q. Fu *et al.*, DNA analysis of an early modern human from Tianyuan Cave, China. *Proc. Natl. Acad. Sci. U.S.A.* **110**, 2223–2227 (2013).
37. V. Formicola, A. Pontrandolfi, J. Svoboda, The Upper Paleolithic triple burial of Dolní Vestonice: pathology and funerary behavior. *Am. J. Phys. Anthropol.* **115**, 372–379 (2001).
38. A. W. Briggs *et al.*, Targeted Retrieval and Analysis of Five Neandertal mtDNA Genomes. *Science.* **325**, 318–321 (2009).
39. R. E. Green *et al.*, A complete Neandertal mitochondrial genome sequence determined by high-throughput sequencing. *Cell.* **134**, 416–426 (2008).
40. M.-T. Gansauge, M. Meyer, Selective enrichment of damaged DNA molecules for ancient genome sequencing. *Genome Res.* **24**, 1543–1549 (2014).
41. M. G. Thomas, K. W. P. Miller, C. G. N. Mascie-Taylor, Mitochondrial DNA and IQ in Europe. *Intelligence.* **26**, 167–173 (1998).

**Table 1.** Neandertal signatures in human mitochondrial genomes associated with disease. BD = Bipolar disorder, AD = Alzheimer`s disease, PD = Parkinsons`s disease, DM = Diabetes Mellitus. Disease associated information was obtained from MITOMAP (<http://www.mitomap.org/MITOMAP>) (28). References of SNPs disease associations in Table 1 are in Supplementary Data (42-131). (\*) indicate signatures shared with only one Ancient *H. sapiens* sample.

**(Table in next page).**

| Position             | 195                                        | 3,010                                  | 5,460                                     | 5,821                    | 10,398                                                                                                                                                                   | 15,043                                                                                       | 16,093                                | 16,129*                                                    | 16,183                           | 16,189*                                                                                                                                                                | 16,519                                                                                                                                                      |
|----------------------|--------------------------------------------|----------------------------------------|-------------------------------------------|--------------------------|--------------------------------------------------------------------------------------------------------------------------------------------------------------------------|----------------------------------------------------------------------------------------------|---------------------------------------|------------------------------------------------------------|----------------------------------|------------------------------------------------------------------------------------------------------------------------------------------------------------------------|-------------------------------------------------------------------------------------------------------------------------------------------------------------|
| Region / gene        | D-loop                                     | 16S rRNA                               | ND2                                       | tRNA-Cys                 | ND3                                                                                                                                                                      | CYTB                                                                                         | D-loop                                | D-loop                                                     | D-loop                           | D-loop                                                                                                                                                                 | D-loop                                                                                                                                                      |
| DNA change           | T > C                                      | G > A                                  | G > A                                     | G > A                    | A > G                                                                                                                                                                    | G > A                                                                                        | T > C                                 | G > A                                                      | A > C                            | T > C                                                                                                                                                                  | T > C                                                                                                                                                       |
| Type                 | Transition                                 | Transition                             | Transition                                | Transition               | Transition                                                                                                                                                               | Transition                                                                                   | Transition                            | Transition                                                 | Transversion                     | Transversion                                                                                                                                                           | Transition                                                                                                                                                  |
| Codon position       | -                                          | -                                      | 1                                         | -                        | 1                                                                                                                                                                        | 3                                                                                            | -                                     | -                                                          | -                                | -                                                                                                                                                                      | -                                                                                                                                                           |
| Codon effect         | -                                          | -                                      | Non synonymous                            | -                        | Non Synonymous                                                                                                                                                           | Synonymous                                                                                   | -                                     | -                                                          | -                                | -                                                                                                                                                                      | -                                                                                                                                                           |
| Codon change         | -                                          | -                                      | GCC > ACC                                 | -                        | ACC > GCC                                                                                                                                                                | GGG > GGA                                                                                    | -                                     | -                                                          | -                                | -                                                                                                                                                                      | -                                                                                                                                                           |
| Protein change       | -                                          | -                                      | Ala > Ter                                 | -                        | Thr > Ala                                                                                                                                                                | No change                                                                                    | -                                     | -                                                          | -                                | -                                                                                                                                                                      | -                                                                                                                                                           |
| Disease associations | Bipolar disorder / melanoma patients       | Cyclic Vomiting Syndrome with Migraine | Alzheimer's disease / Parkinson's disease | Deafness helper mutation | Invasive Breast Cancer risk factor; AD; PD; BD lithium response; Type 2 DM, PD protective factor / longevity / altered cell pH / metabolic syndrome / breast cancer risk | Major depressive disorder                                                                    | Cyclic Vomiting Syndrome              | Cyclic Vomiting Syndrome with Migraine                     | Melanoma patients                | Diabetes / Cardiomyopathy / Endometrial cancer risk / mtDNA copy number / Metabolic Syndrome / Melanoma patients / Cyclic Vomiting Syndrome with Migraine / metastasis | Cyclic Vomiting Syndrome with Migraine /metastasis / glioblastoma, gastric, lung, ovarian, prostate tumors                                                  |
| Modern haplogroups   | L2a1f, L4a1, L5a1a, L6a, W1, K, J2a2a, M2b | H1a1, J1c, D4                          | L0a1b1, L4a1, W1, Q1                      | C7                       | L0a1b1, L1c3a, L2a1f, L3d3b, L4a1, L5a1a, L6a, J1c, I1, J2a2a, K, K1, C1a, C4, C7, D4, E1, G1a1, M20, M29a, M2b, M3b, M8a1, M9a, Q1, Y1, Z1                              | U6a7a2, U1a1d, I1, C1a, K1, H3, C4, C7, D4, E1, G1a1, M20, M29a, M2b, M3b, M8a1, M9a, Q1, Z1 | L4a1, R0a, L0a1b1, K1, H3, T1, A, C1a | L0a1b1, L1c3a, L5a1a, I1, F1a1, M20, N9a1, Q1, Oberkassel* | X1a, X3, U1a1d, B2, M2b, M29a, O | L0a1b1, L1c3a, L2a1f, L5a1a, T1, U1a1d, X3, X1a, R0a, O, M29a, M2b, B2, Tianyuan*                                                                                      | L1c3a, L2a1f, L6a, H15, H1a1, H3, I1, K, K1, K2a2a, R0a1a3, R1a, U2c, V1a, W1, X1a, X3, B2, C4, C7, E1, F1a1, G1a1, M20, M29a, M2b, M3b, N1b1a3, N2a, O, P2 |
| Neandertal           | Altai                                      | Altai                                  | Altai                                     | Altai                    | Altai                                                                                                                                                                    | Altai                                                                                        | Feldhofer1                            | Altai                                                      | El Sidron 1253                   | El Sidron 1253                                                                                                                                                         | Altai                                                                                                                                                       |
|                      |                                            | El Sidron 1253                         | El Sidron 1253                            | El Sidron 1253           | Vindija 33.16                                                                                                                                                            | El Sidron 1253                                                                               | Vindija 33.25                         | Feldhofer 1                                                | Feldhofer 1                      | Feldhofer 1                                                                                                                                                            | El Sidron 1253                                                                                                                                              |
|                      |                                            | Feldhofer 1                            | Feldhofer 1                               | Feldhofer 1              | Vindija 33.17                                                                                                                                                            | Feldhofer 1                                                                                  |                                       | Feldhofer 2                                                | Feldhofer 2                      | Feldhofer 2                                                                                                                                                            | Feldhofer 1                                                                                                                                                 |
|                      |                                            | Feldhofer 2                            | Feldhofer 2                               | Feldhofer 2              | Vindija 33.19                                                                                                                                                            | Feldhofer 2                                                                                  |                                       | Mezmaiskaya1                                               | Mezmaiskaya1                     | Mezmaiskaya1                                                                                                                                                           | Feldhofer 2                                                                                                                                                 |
|                      |                                            | Mezmaiskaya1                           | Mezmaiskaya1                              | Mezmaiskaya1             | Feldhofer 1                                                                                                                                                              | Mezmaiskaya1                                                                                 |                                       | Vindija 33.16                                              | Vindija 33.16                    | Vindija 33.16                                                                                                                                                          | Mezmaiskaya1                                                                                                                                                |
|                      |                                            | Vindija 33.16                          | Vindija 33.16                             | Vindija 33.16            | Feldhofer 2                                                                                                                                                              | Vindija 33.16                                                                                |                                       | Vindija 33.17                                              | Vindija 33.17                    | Vindija 33.17                                                                                                                                                          | Vindija 33.16                                                                                                                                               |
|                      |                                            | Vindija 33.17                          | Vindija 33.17                             | Vindija 33.17            | El Sidron 1253                                                                                                                                                           | Vindija 33.17                                                                                |                                       | Vindija 33.19                                              | Vindija 33.19                    | Vindija 33.19                                                                                                                                                          | Vindija 33.17                                                                                                                                               |
|                      |                                            | Vindija 33.19                          | Vindija 33.19                             | Vindija 33.19            | Vindija 33.25                                                                                                                                                            | Vindija 33.19                                                                                |                                       | Vindija 33.25                                              | Vindija 33.25                    | Vindija 33.25                                                                                                                                                          | Vindija 33.19                                                                                                                                               |
|                      |                                            | Vindija 33.25                          | Vindija 33.25                             | Vindija 33.25            | Mezmaiskaya1                                                                                                                                                             | Vindija 33.25                                                                                |                                       |                                                            |                                  |                                                                                                                                                                        | Vindija 33.25                                                                                                                                               |

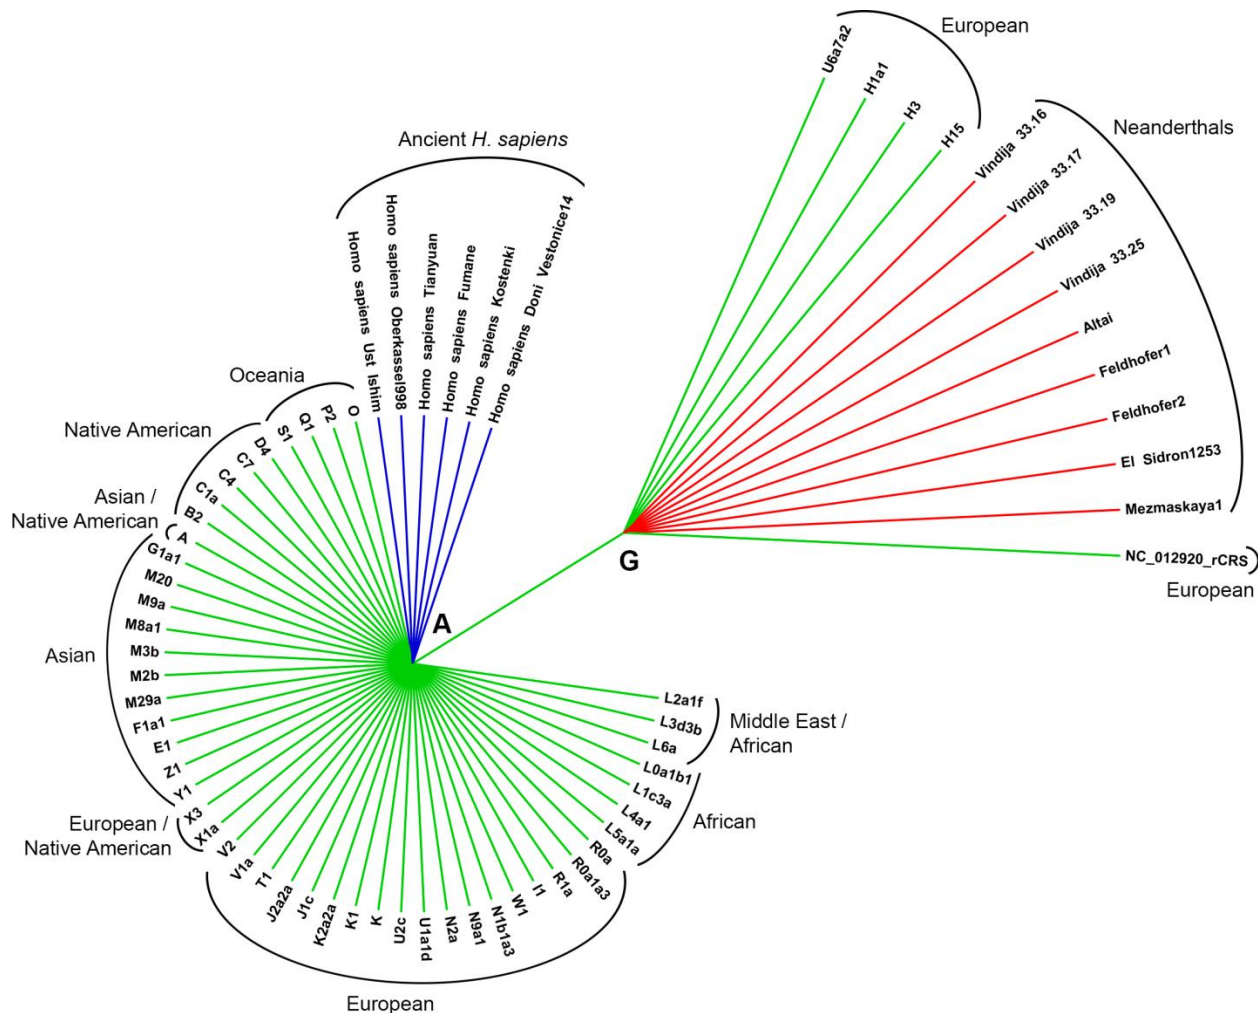

**Fig. 1.** Cladogram of mitochondrial genome position 2,706 (in the 16S rRNA gene) depicting the character states (G and A) in the respective clusters. This genetic signature (Neandertal signature 2706G) is present in all Neandertal sequences (Red branches) and in European haplogroups U (U5a7a2) and H (H1a1, H3, H15), including the Revised Cambridge Reference Sequence (rCRS, haplogroup H2a2a1). The Neandertal signature 2706G is absent in all of the Ancient *H. sapiens* (Anatomically Modern Humans from Europe in temporal overlap with Neandertals - Blue branches) and other modern mitochondrial haplogroups. Position numbering corresponds to rCRS positions.

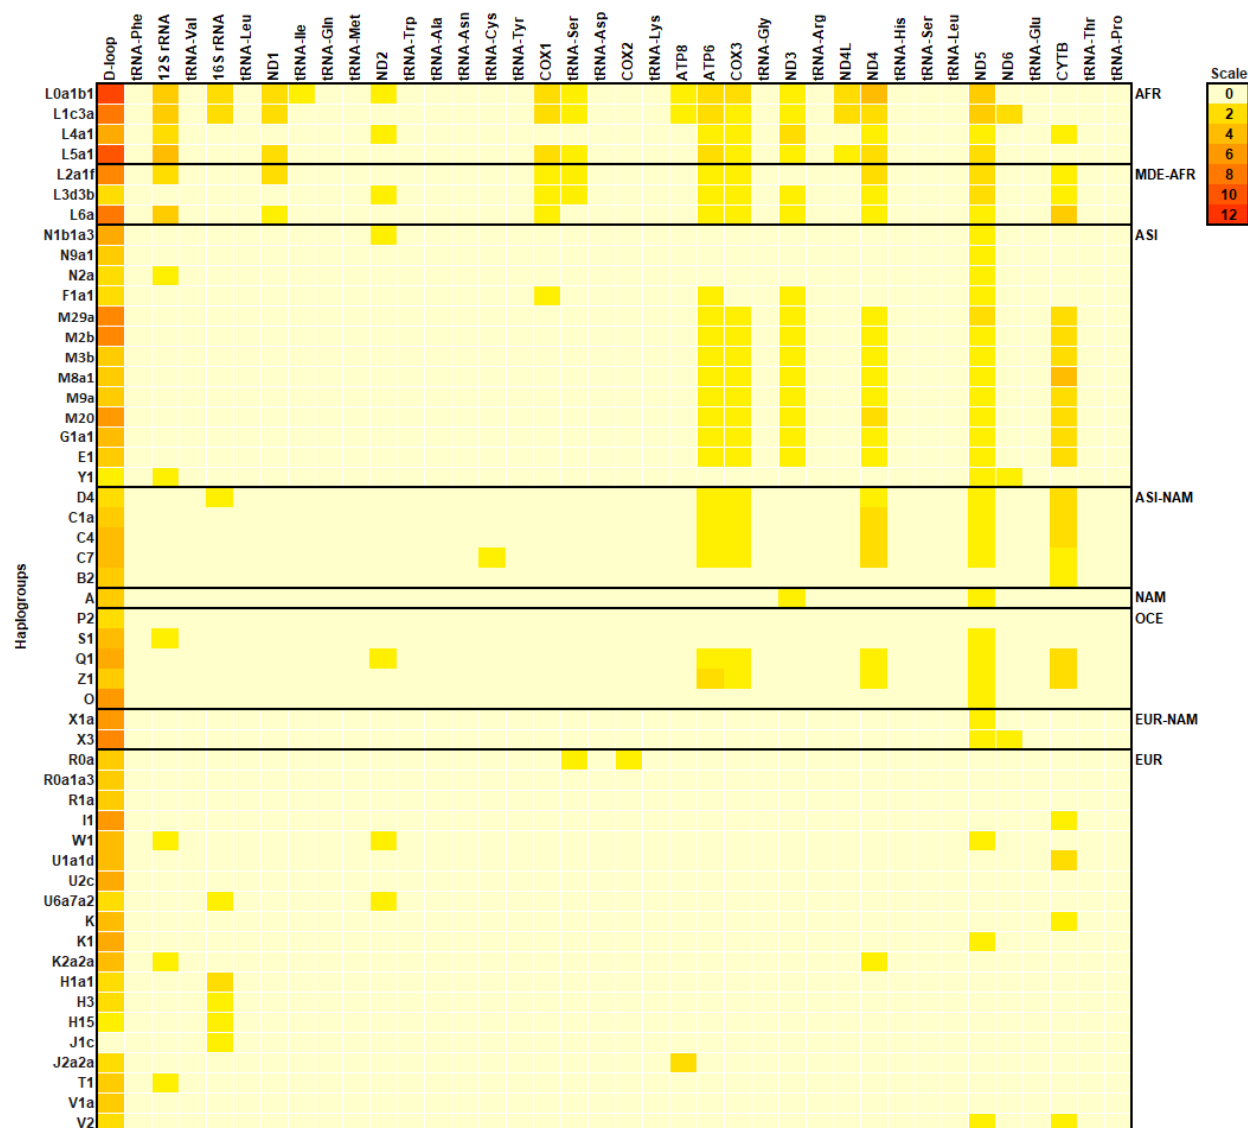

**Fig. 2.** Distribution heatmap of Neandertal signatures along the mitochondrial genome in different haplogroups. The color scale indicates the number of Neandertal signatures present in modern human mitochondrial haplogroups. These signatures are absent in Ancient *H. sapiens* whose time range overlapped with Neandertals in Europe (from approximately 50,000 to 28,000 years ago, Supplementary Table S2). AFR=African, ASI=Asian, MDE=Middle East, NAM=Native American, OCE=Oceania and EUR=European.



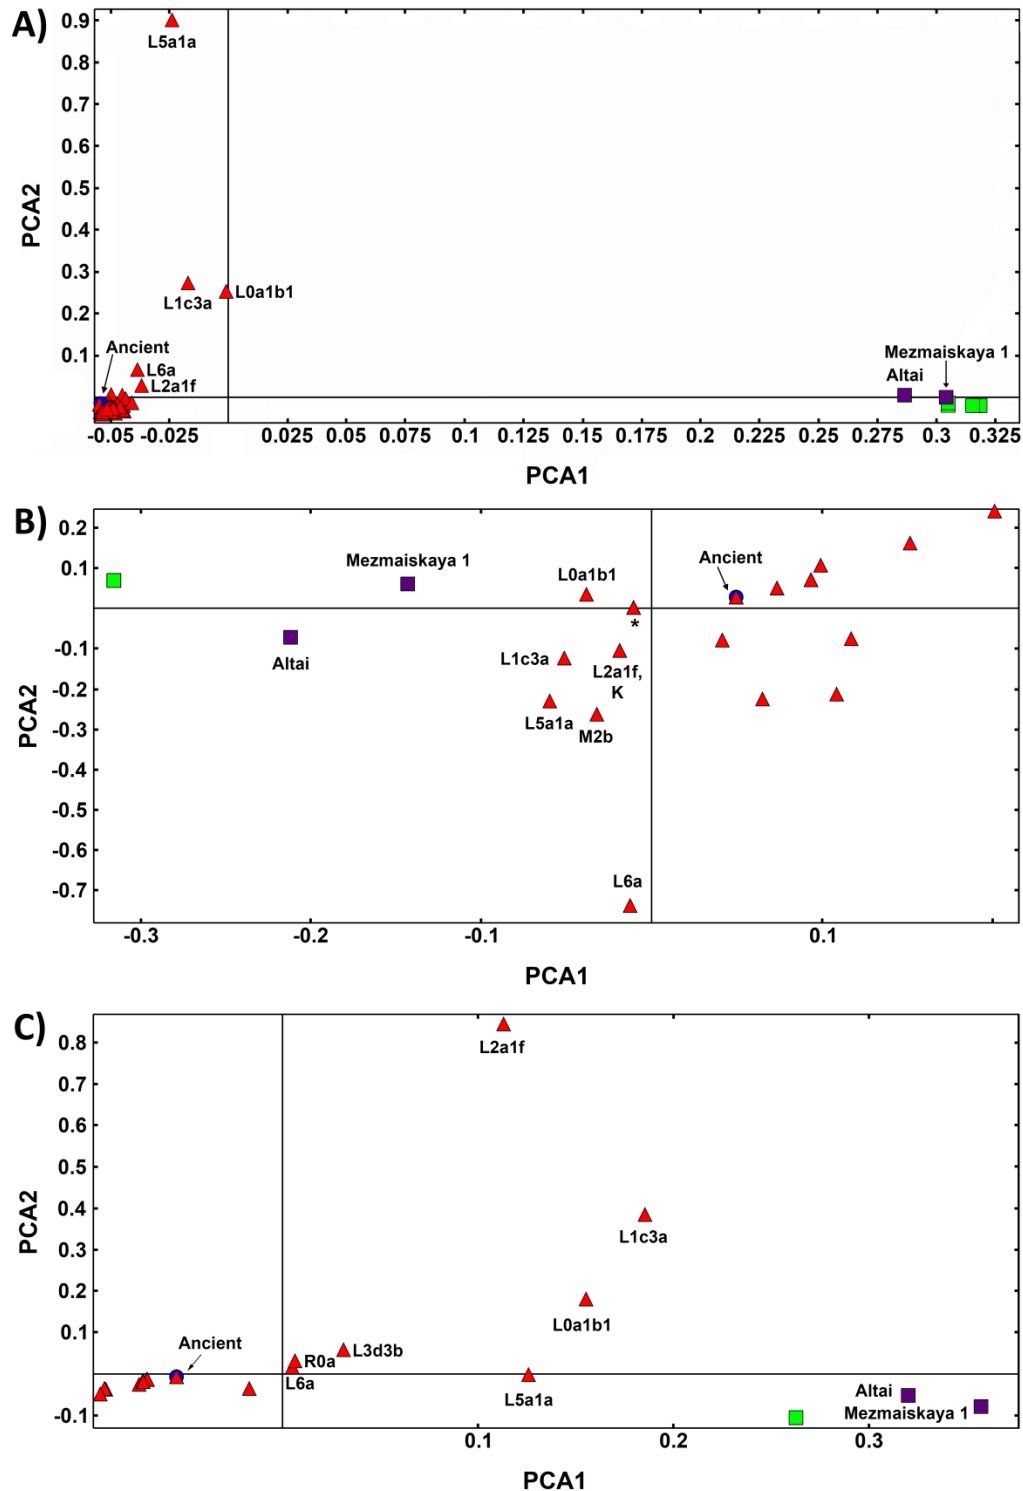

**Fig. 3.** Principal Component Analysis (PCA) of Human and Neandertal mitochondrial genomes. In (A) PCA results for 68 mitogenomes using 9 Neandertals (green square for H-like sequences

and purple square for L-like sequences), 6 Ancient *H. sapiens* (blue circle) and 53 modern *H. sapiens* haplogroups (red triangle). X-Axis denotes the value for PC1, while y-Axis denotes values for PC2. Each dot in the figure represents one or more individuals. In (B) PCA results for the 128 to 315 segment extracted from the 68 mitogenome alignment. Sequences were 9 Neandertals (green square for H-like sequences and purple square for L-like sequences), 6 Ancient *H. sapiens* (blue circle) and 53 modern *H. sapiens* haplogroups (red triangle). X-Axis denotes the value for PC1, while y-Axis denotes values for PC2. Each dot in the figure represents one or more individuals. In (C) PCA results for the 6,950 to 7,660 segment extracted from the 68 mitogenome alignment. Sequences were 9 Neandertals (green square for H-like sequences and purple square for L-like sequences), 6 Ancient *H. sapiens* (blue circle) and 53 modern *H. sapiens* haplogroups (red triangle). X-Axis denotes the value for PC1, while y-Axis denotes values for PC2. Each dot in the figure represents one or more individuals.

## Supplementary data

**Table S1.** Accession numbers of present day *H. sapiens* mitogenomes used in this study.

| Haplogroup - Present-day <i>H. sapiens</i> from Phylotree data base (25) | Genbank number |
|--------------------------------------------------------------------------|----------------|
| L0a1b1                                                                   | AF381988       |
| L1c3a                                                                    | AF381992       |
| L2a1f                                                                    | AY195776       |
| L3d3b                                                                    | AF381998       |
| L4a1                                                                     | FJ460531       |
| L5a1a                                                                    | DQ341060       |
| L6a                                                                      | EU092773       |
| N1b1a3                                                                   | AY195756       |
| N9a1                                                                     | HM589048       |
| N2a                                                                      | JF904935       |
| A                                                                        | AP013225       |
| B2                                                                       | EF648602       |
| F1a1                                                                     | NA17963        |
| M29a                                                                     | DQ137407       |
| M2b                                                                      | EU443512       |
| M3b                                                                      | FJ383523       |
| M8a1                                                                     | KF148510       |
| M9a                                                                      | HM346891       |
| M20                                                                      | JX289112       |
| G1a1                                                                     | HM460792       |
| E1                                                                       | KF540505       |
| D4                                                                       | JQ704974       |
| C1a                                                                      | EU007858       |
| C4                                                                       | FJ951604       |
| C7                                                                       | FJ951594       |
| P2                                                                       | AY289088       |
| S1                                                                       | AF346963       |
| Q1                                                                       | AY289090       |
| Z1                                                                       | AY519493       |
| O                                                                        | AY289059       |
| Y1                                                                       | KF540727       |
| R0a                                                                      | JX153281       |
| R0a1a3                                                                   | GU592021       |
| R1a                                                                      | KC985147       |
| I1                                                                       | JQ245776       |
| W1                                                                       | EU558696       |
| X1a                                                                      | EU600318       |
| X3                                                                       | EF177437       |
| U1a1d                                                                    | EF692533       |
| U2c                                                                      | AY714010       |
| U6a7a2                                                                   | AF382008       |
| K                                                                        | AF382005       |
| K1                                                                       | EU073969       |
| K2a2a                                                                    | EU327986       |
| H1a1                                                                     | EU007858       |
| H3                                                                       | EU150187       |
| H15                                                                      | KC911292       |
| J1c                                                                      | EU547187       |
| J2a2a                                                                    | EF660967       |
| T1                                                                       | JQ797976       |
| V1a                                                                      | JQ702026       |
| V2                                                                       | JQ703647       |

**Table S2.** Accession numbers, dating and references of Ancient *H. sapiens* mitogenomes used in this study. Oberkassel998 haplogroup full designation is U5b1+16189+@16192. W. Siberia = West Siberia, Czech Rep. = Czech Republic. Quality % is the quality of haplogroup inference as calculated by Haplogrep 2 program (30). \*=The Ust-Ishim sequence was assembled using reads downloaded from Study PRJEB6622 at the European Nucleotide Archive (EMBL-EBI) and assembled using the CLC Genomics Workbench 7 program (<https://www.qiagenbioinformatics.com/>).

| <b>Ancient <i>H. sapiens</i></b> | <b>Genbank/ENA*</b> | <b>Age (years)</b> | <b>Location</b> | <b>Haplogroup</b> | <b>Quality %</b> | <b>Reference</b> |
|----------------------------------|---------------------|--------------------|-----------------|-------------------|------------------|------------------|
| <b>Ust-Ishim</b>                 | PRJEB6622*          | 45,000             | W. Siberia      | R                 | 87.89            | (35)             |
| <b>Fumane 2</b>                  | KP718913            | 41-39,000          | Italy           | R                 | 94.43            | (35)             |
| <b>Tianyuan</b>                  | KC417443            | 40,000             | China           | B4'5              | 91.17            | (35, 36)         |
| <b>Kostenki 14</b>               | FN600416            | 39-36,000          | Russia          | U2                | 92.69            | (35)             |
| <b>Doni Vestonice 14</b>         | KC521458            | 31,000             | Czech Rep.      | U5                | 100              | (35, 37)         |
| <b>Oberkassel998</b>             | KC521457            | 14,000             | Germany         | U5b1+             | 99.45            | (35)             |

**Table S3.** Accession numbers, dating and references of Neandertal mitogenomes used in this study. Quality % is the quality of haplogroup inference as calculated by Haplogrep 2 program (30).

| <b><i>H. Neandertalensis</i></b> | <b>Genbank</b> | <b>Age (years)</b> | <b>Location</b> | <b>Haplogroup</b> | <b>Quality %</b> | <b>Reference</b> |
|----------------------------------|----------------|--------------------|-----------------|-------------------|------------------|------------------|
| <b>Mezmaskaya 1</b>              | FM865411       | 65,000             | Russia          | L1'2'3'4'5'6      | 55.12            | (35, 38)         |
| <b>Altai</b>                     | KC879692       | 50,000             | Siberia         | L1'2'3'4'5'6      | 55.96            | (3)              |
| <b>Feldhofer 1</b>               | FM865407       | 40,000             | Germany         | H1as              | 52.84            | (38)             |
| <b>Feldhofer 2</b>               | FM865408       | 40,000             | Germany         | H1e               | 52.81            | (38)             |
| <b>El Sidron 1253</b>            | FM865409       | 39,000             | Spain           | H1e               | 52.81            | (35, 38)         |
| <b>Vindija 33.16</b>             | AM948965       | 38,000             | Croatia         | H1e               | 52.74            | (39)             |
| <b>Vindija 33.17</b>             | KJ533544       | Not dated          | Croatia         | H1e               | 52.75            | (40)             |
| <b>Vindija 33.19</b>             | KJ533545       | Not dated          | Croatia         | H1e               | 52.74            | (40)             |
| <b>Vindija 33.25</b>             | FM865410       | Not dated          | Croatia         | H1as              | 52.84            | (38)             |

**Table S4.** Neandertal genomic signatures associated with variation in intelligence quotient (IQ) (41).

| Position | Sequences                                                                                                                                                                                                                                                                                             | Change |
|----------|-------------------------------------------------------------------------------------------------------------------------------------------------------------------------------------------------------------------------------------------------------------------------------------------------------|--------|
| 16,189   | O, M29a, M2b, B2 (Asian)<br>T1, U1a1d, X3, X1a, R0a (European)<br>L0a1b1, L1c3a, L2a1f, L5a1a (African)<br>Vindija 33.16, Vindija 33.17, Vindija 33.19 (Neandertals)<br>Vindija, 33.25, Feldhofer 1, Feldhofer 2 (Neandertals)<br>Mezmaiskaya 1 (Neandertal)<br>Tianyuan (Ancient <i>H. sapiens</i> ) | T > C  |
| 16,278   | L0a1b1, L1c3a, L2a1f, L5a1a, L6a (African)<br>X3, U2c (European)<br>P2 (Asian)<br>All Neandertals                                                                                                                                                                                                     | C > T  |
| 16,298   | V1a, V2 (European)<br>M8a1, C1a, C4, C7, Z1 (Asian)<br>Altai Neandertal                                                                                                                                                                                                                               | T > C  |

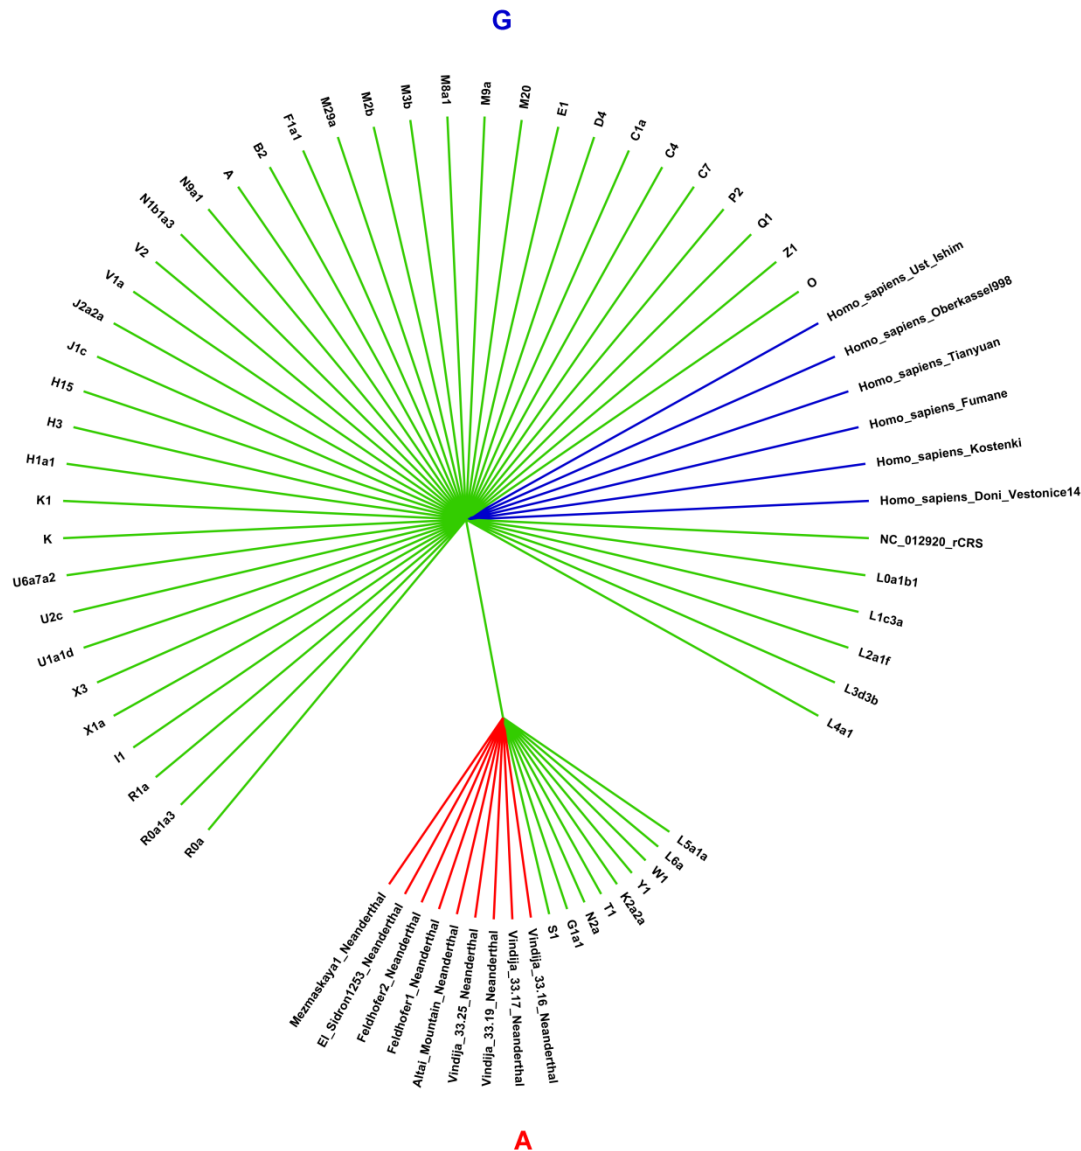

**Fig. S1.** Cladogram of position 1,018 in the 12S rRNA gene (Neandertal signature 1018A). This SNP is a transition (A-G) present in all of the Archaic *H. sapiens* sequences (Blue) but absent in all Neandertal sequences (Red) and modern African haplogroups L5, L6 and European haplogroups W, Y, K, T, N, G and S.

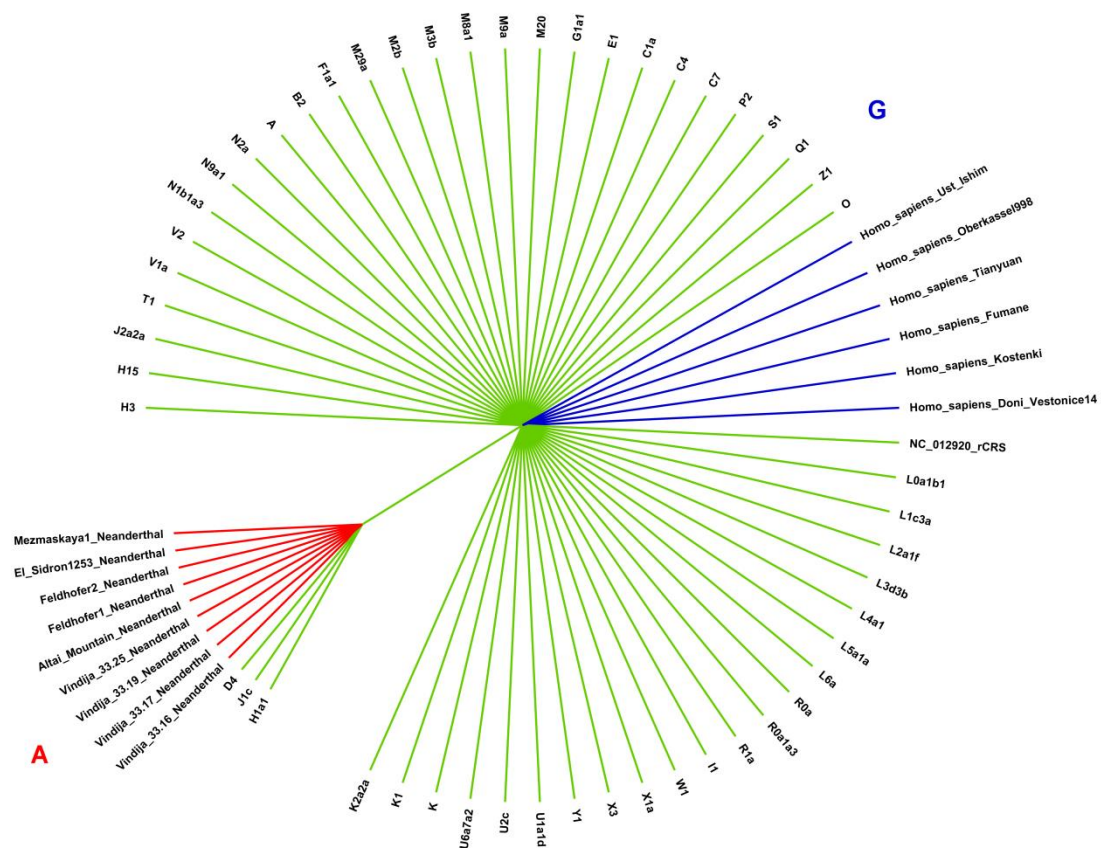

**Fig. S2.** Cladogram of position 3,010 in 16S rRNA gene (Neandertal signature 3010A). This SNP is a transition (A-G) present in all of the Archaic *H. sapiens* sequences (Blue) but absent in all Neandertals (Red) the European haplogroup H, Middle Eastern haplogroup J and the Asian haplogroup D.

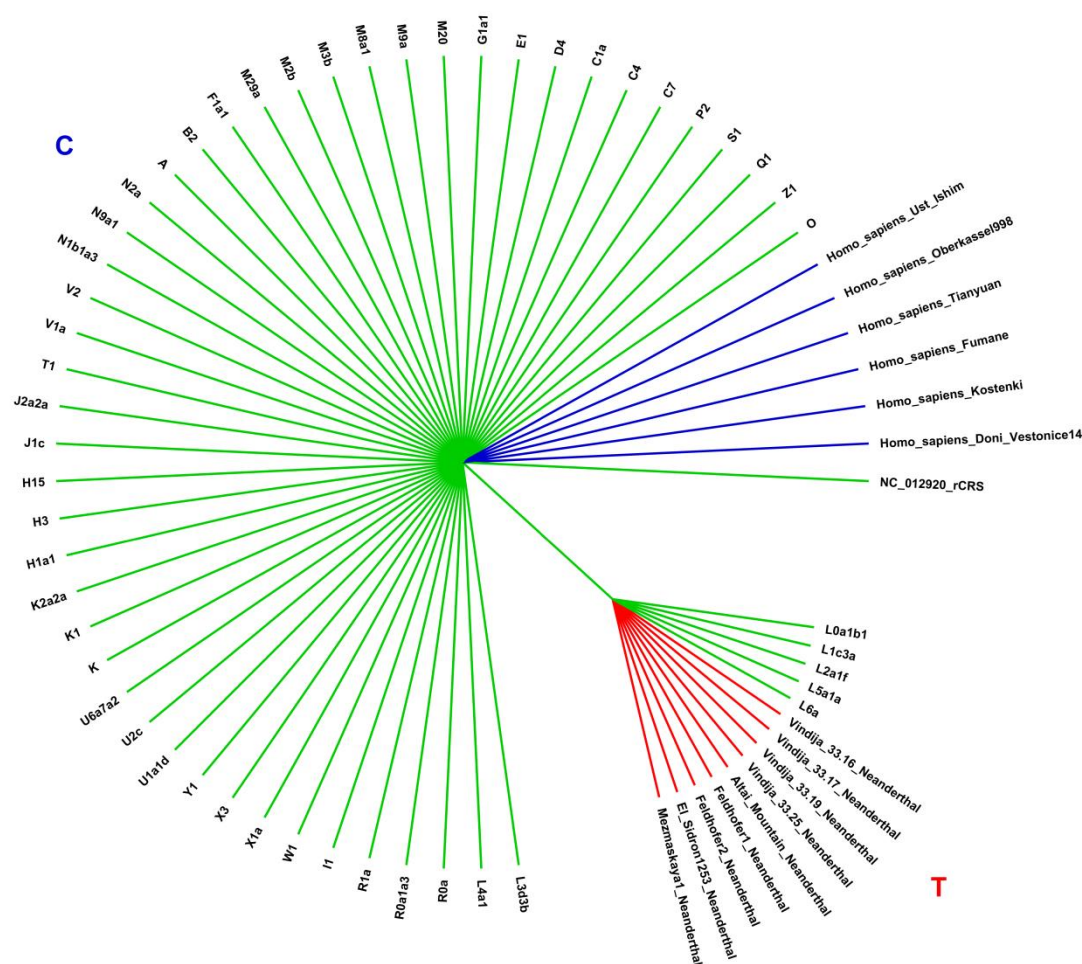

**Fig. S3.** Cladogram of position 3,594 in the NADH dehydrogenase 1 (*ND1*) gene (Neandertal signature 3594T). This SNP is a T-C transition in the third codon position leading to the synonymous codon change GTT>GTC. This SNP is present in all of the Archaic *H. sapiens* sequences (Blue) but is not present in Neandertals (Red) and African haplogroups L0, L1, L2, L5 and L6.



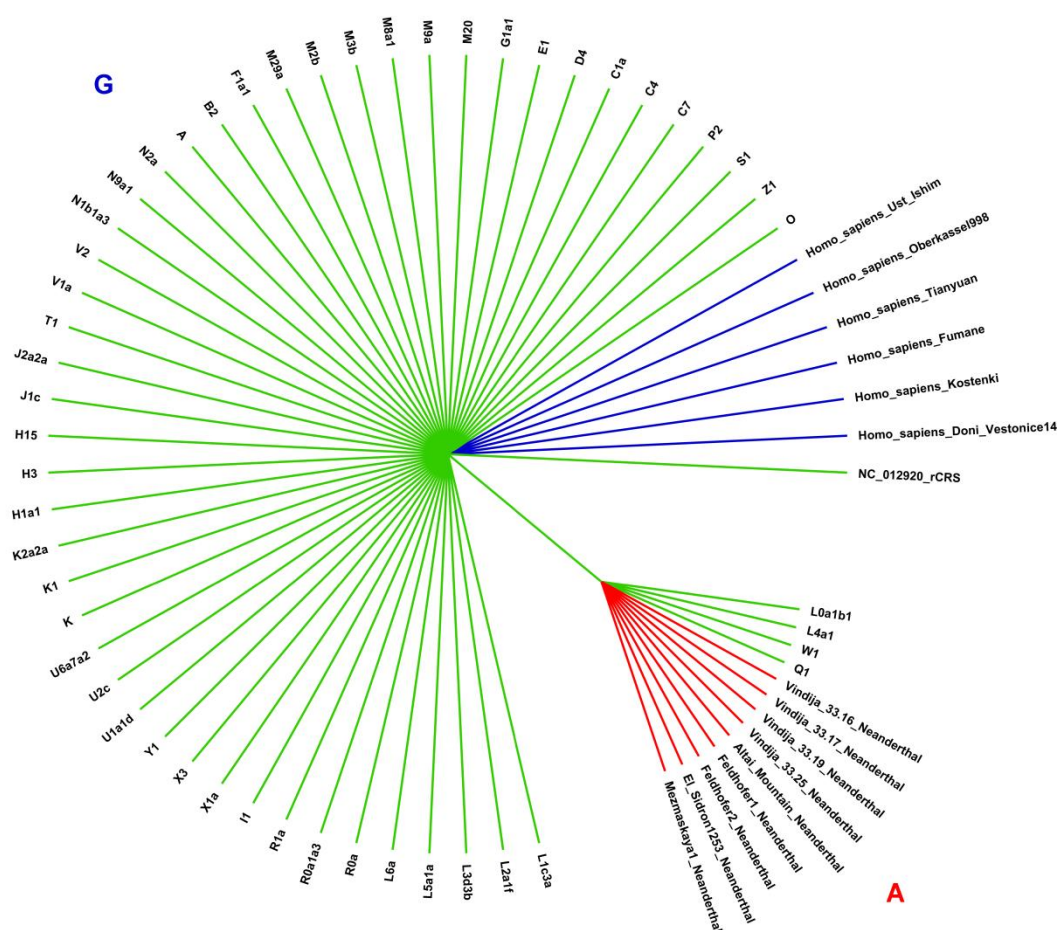

**Fig. S4.** Cladogram of position 5,460 in NADH dehydrogenase 2 (*ND2*) gene (Neandertal signature 5460A). This transition (A-G) in the first codon position leads to a non-synonymous codon change ACC>GCC causing the amino acid change Thr>Ala. This transition is present in all Archaic *H. sapiens* sequences (Blue) but absent in all Neandertal sequences (Red) and in modern haplogroups L0, L4 (African), W and Q

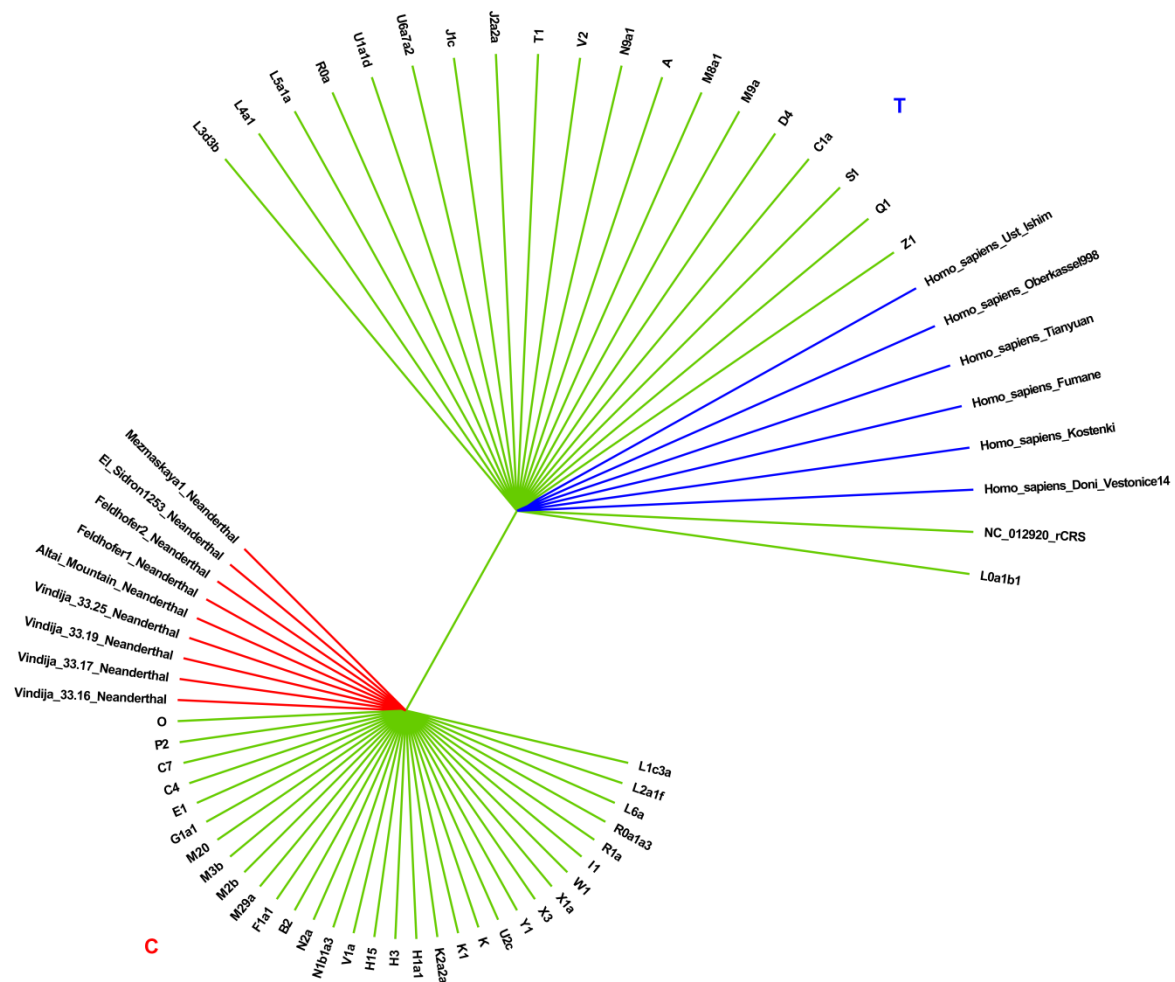

**Fig. S5.** Cladogram of position 16,519 in the D-loop (Neandertal signature 16519C). This SNP is a transition (C-T) present in all of the Archaic *H. sapiens* sequences (Blue) but absent in all Neandertals (Red) the European haplogroups U, K, X, W, I, V, H, African haplogroups L1, L2, L6 and Asian haplogroups N, F, B, M, G, E, C, P and O.

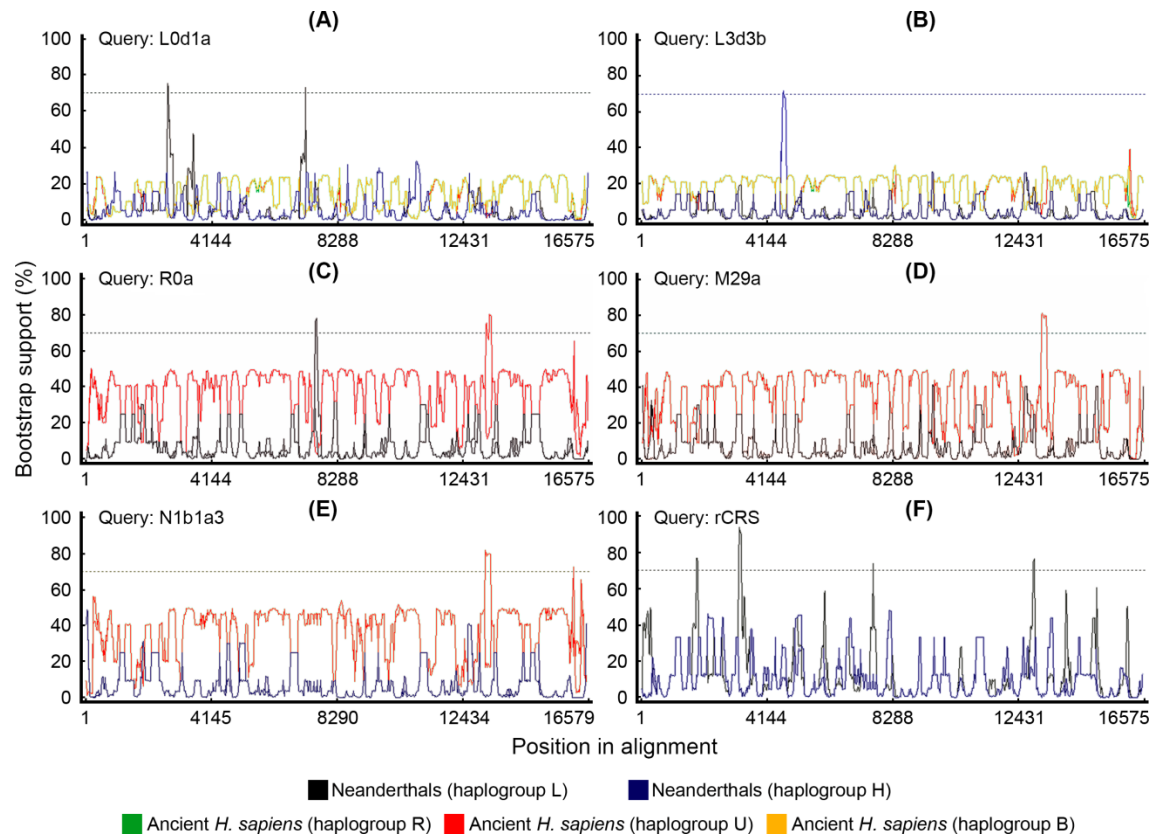

**Fig. S6.** Bootscan analysis of different modern haplogroups as queries and Ancient *H. sapiens* or Neanderthals as putative parental sequences.

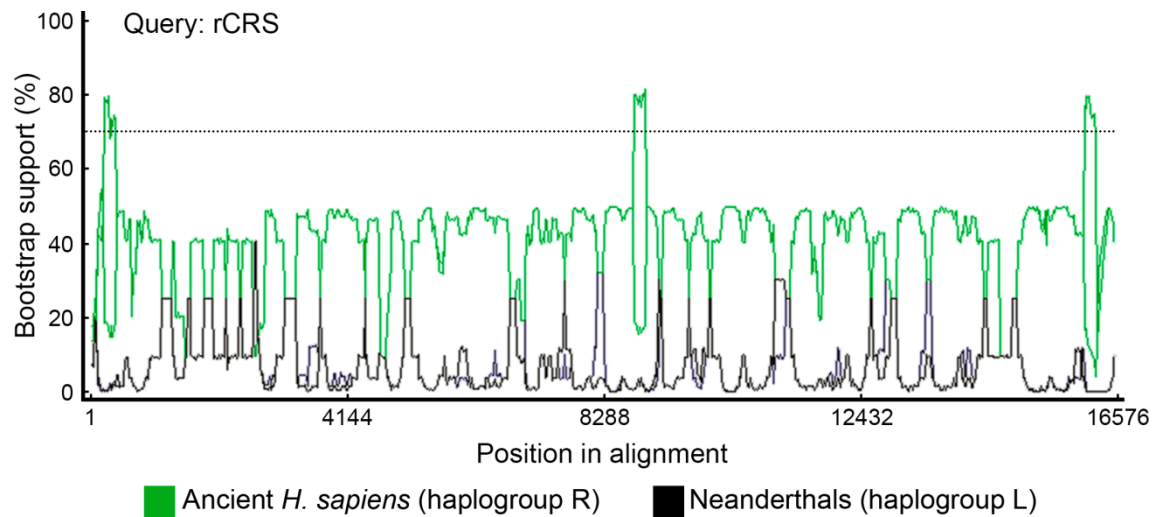

**Fig. S7.** Bootsacan analysis of the rCRS sequence (haplogroups H2a2a1) using Ancient *H.sapiens* and Neandertals as putative parentals.

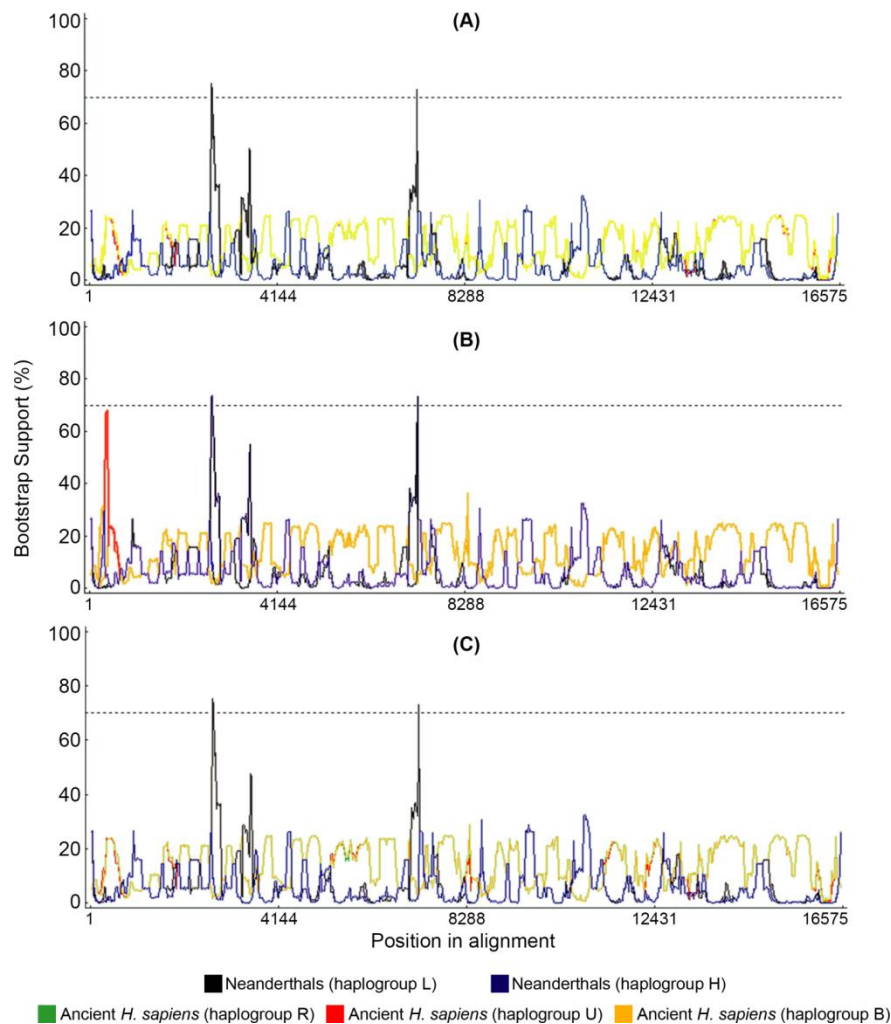

**Fig. S8.** Bootscan/RDP analysis of haplogroup L0d1a showing the consistency of the recombination profile regardless the alignment algorithm or bootscan model option. (A) Map to reference alignment and Felsenstein model on bootscan; (B) MAFFT alignment with Kimura two parameters model on bootscan; (C) Map to reference alignment and Kimura two parameters model on bootscan (same as panel A in figure S6). Neandertal sequences from haplogroup L (black line) and haplogroup H (blue line) and Ancient *H. sapiens* from haplogroup R (green line), haplogroup U (red line) and haplogroup B (orange line) were used as parentals. Neandertal sequences were Feldhofer 1, Mezmaiskaya and Vindija33\_16 and ancient *H. sapiens* sequences were Kostenki, Fumane, Doni Vestonice 14 and Tianyuan.

## Supplementary Data References of Table 1:

### T195C

42. D. W. Collins, *et al.*, Association of primary open-angle glaucoma with mitochondrial variants and haplogroups common in African Americans. *Molecular Vision*. **22**: 454-471 (2016).
43. S. Ebner, *et al.*, Mitochondrial haplogroups, control region polymorphisms and malignant melanoma: a study in middle European Caucasians *PLoS One*. **6**: e27192 (2011).
44. B. Rollins, *et al.*, Mitochondrial variants in schizophrenia, bipolar disorder, and major depressive disorder *PLoS One*. **4**: e4913 (2009).

### G3010A

45. E. Ruiz-Pesini, D. C. Wallace, Evidence for adaptive selection acting on the tRNA and rRNA genes of the human mitochondrial DNA. *Human Mutation*. **27**: 1072-1081 (2006).
46. R. Saxena, *et al.*, Comprehensive association testing of common mitochondrial DNA variation in metabolic disease. *American Journal of Human Genetics*. **79**: 54-61 (2006).
47. R. G. Boles, *et al.*, Are pediatric and adult-onset cyclic vomiting syndrome (CVS) biologically different conditions? Relationship of adult-onset CVS with the migraine and pediatric CVS-associated common mtDNA polymorphisms 16519T and 3010A. *Neurogastroenterology and Motility*. **21**: 936-e72 (2009).
48. T. Venkatesan, *et al.*, Quantitative pedigree analysis and mitochondrial DNA sequence variants in adults with cyclic vomiting syndrome. *BMC Gastroenterology*. **14**: 181 (2014).
49. E. A. Zaki, *et al.*, Two common mitochondrial DNA polymorphisms are highly associated with migraine headache and cyclic vomiting syndrome. *Cephalalgia*. **29**: 719-728 (2009).
50. D. W. Collins, *et al.*, Association of primary open-angle glaucoma with mitochondrial variants and haplogroups common in African Americans. *Molecular Vision*. **22**: 454-471 (2016).

### G5460A

51. N. Tanaka, *et al.*, Mitochondrial DNA variants in a Japanese population of patients with Alzheimer's disease. *Mitochondrion*. **10**: 32-37 (2010).
52. A. L. Mitchell, J. L. Elson, N. Howell, R. W. Taylor, D. M. Turnbull, Sequence variation in mitochondrial complex I genes: mutation or polymorphism? *Journal of Medical Genetics*. **43**: 175-179 (2006).
53. S. Kosel, C. B. Lucking, R. Egensperger, P. Mehraein, M. B. Graeber, Mitochondrial NADH dehydrogenase and CYP2D6 genotypes in Lewy-body parkinsonism. *Journal of Neuroscience Research*. **44**: 174-183 (1996).
54. R. Saxena, *et al.*, Comprehensive association testing of common mitochondrial DNA variation in metabolic disease. *American Journal of Human Genetics*. **79**: 54-61 (2006).



55. N. M. Schnopp, S. Kosel, R. Egensperger, M. B. Graeber, Regional heterogeneity of mtDNA heteroplasmy in parkinsonian brain. *Clinical Neuropathology*. **15**: 348-352 (1996).
56. S. Kosel, R. Egensperger, P. Mehraein, M.B. Graeber, No association of mutations at nucleotide 5460 of mitochondrial NADH dehydrogenase with Alzheimer's disease. *Biochem. Biophys. Res. Comm.* **203**: 745-749 (1994).
57. V. Petruzzella, X. Chen, E.A. Schon, Is a point mutation in the mitochondrial ND2 gene associated with Alzheimer's disease? *Biochem. Biophys. Res. Comm.* **186**: 491-497 (1992).
58. F. Lin, *et al.*, Detection of point mutations in codon 331 of mitochondrial NADH dehydrogenase subunit 2 in Alzheimer's brains. *Biochem. Biophys. Res. Comm.* **182**: 238-246 (1992).

#### G5821A

59. Levin, L., Zhidkov, I., Gurman, Y., Hawlena, H., Mishmar, D. (2013) Functional recurrent mutations in the human mitochondrial phylogeny: dual roles in evolution and disease *Genome Biology and Evolution*. 5 (5): 876-890.
60. Zhou, X., Wei, Q., Yang, L., Tong, Y., Zhao, F., Lu, C., Qian, Y., Sun, Y., Lu, F., Qu, J., Guan, M. X. (2006) Leber's hereditary optic neuropathy is associated with the mitochondrial ND4 G11696A mutation in five Chinese families *Biochemical and Biophysical Research Communications*. 340 (1): 69-75.
61. Young, W. Y., Zhao, L., Qian, Y., Li, R., Chen, J., Yuan, H., Dai, P., Zhai, S., Han, D., Guan, M. X. (2006) Variants in mitochondrial tRNAGlu, tRNAArg, and tRNAThr may influence the phenotypic manifestation of deafness-associated 12S rRNA A1555G mutation in three Han Chinese families with hearing loss *American Journal of Medical Genetics. Part A*. 140 (20): 2188-2197.
62. Lu, J., Qian, Y., Li, Z., Yang, A., Zhu, Y., Li, R., Yang, L., Tang, X., Chen, B., Ding, Y., Li, Y., You, J., Zheng, J., Tao, Z., Zhao, F., Wang, J., Sun, D., Zhao, J., Meng, Y., Guan, M. X. (2010) Mitochondrial haplotypes may modulate the phenotypic manifestation of the deafness-associated 12S rRNA 1555A>G mutation *Mitochondrion*. 10 (1): 69-81.

#### A10398G

63. Collins, D. W., Gudiseva, H. V., Trachtman, B., Bowman, A. S., Sagaser, A., Sankar, P., Miller-Ellis, E., Lehman, A., Addis, V., O'Brien, J. M. (2016) Association of primary open-angle glaucoma with mitochondrial variants and haplogroups common in African Americans *Molecular Vision*. 22 (): 454-471.
64. Huerta, C., Sanchez-Ferrero, E., Coto, E., Blazquez, M., Ribacoba, R., Guisasola, L. M., Salvador, C., Alvarez, V. (2007) No association between Parkinson's disease and three polymorphisms in the eNOS, nNOS, and iNOS genes *Neuroscience Letters*. 413 (3): 202-205.
65. Pereira, L., Soares, P., Radivojac, P., Li, B., Samuels, D. C. (2011) Comparing phylogeny and the predicted pathogenicity of protein variations reveals equal purifying selection across the global human mtDNA diversity *American Journal of Human Genetics*. 88 (4): 433-439.

66. Covarrubias, D., Bai, R. K., Wong, L. J., Leal, S. M. (2008) Mitochondrial DNA variant interactions modify breast cancer risk *Journal of Human Genetics*. 53 (10): 924-928.
67. Czarnecka, A. M., Klemba, A., Krawczyk, T., Zdrozny, M., Arnold, R. S., Bartnik, E., Petros, J. A. (2010) Mitochondrial NADH-dehydrogenase polymorphisms as sporadic breast cancer risk factor *Oncology Reports*. 23 (2): 531-535.
68. Datta, S., Majumder, M., Biswas, N. K., Sikdar, N., Roy, B. (2007) Increased risk of oral cancer in relation to common Indian mitochondrial polymorphisms and Autosomal GSTP1 locus *Cancer*. 110 (9): 1991-1999.
69. Wang, L., Bamlet, W. R., de Andrade, M., Boardman, L. A., Cunningham, J. M., Thibodeau, S. N., Petersen, G. M. (2007) Mitochondrial genetic polymorphisms and pancreatic cancer risk *Cancer Epidemiology, Biomarkers and Prevention*. 16 (7): 1455-1459.
70. Otaegui, D., Paisan, C., Saenz, A., Marti, I., Ribate, M., Marti-Masso, J. F., Perez-Tur, J., Lopez de Munain, A. (2004) Mitochondrial polymorphisms in Parkinson's Disease *Neuroscience Letters*. 370 (40577): 171-174.
71. Pezzotti, A., Kraft, P., Hankinson, S. E., Hunter, D. J., Buring, J., Cox, D. G. (2009) The mitochondrial A10398G polymorphism, interaction with alcohol consumption, and breast cancer risk *PLoS One*. 4 (4): e5356.
72. Juo, S. H., Lu, M. Y., Bai, R. K., Liao, Y. C., Trieu, R. B., Yu, M. L., Wong, L. J. (2010) A common mitochondrial polymorphism 10398A>G is associated metabolic syndrome in a Chinese population *Mitochondrion*. 10 (3): 294-299.
73. Kato, T. (2008) Role of mitochondrial DNA in calcium signaling abnormality in bipolar disorder *Cell Calcium*. 44 (1): 92-102.
74. Kazuno, A. A., Munakata, K., Tanaka, M., Kato, N., Kato, T. (2008) Relationships between mitochondrial DNA subhaplogroups and intracellular calcium dynamics *Mitochondrion*. 8 (2): 164-169.
75. Latsoudis, H., Spanaki, C., Chlouverakis, G., Plaitakis, A. (2008) Mitochondrial DNA polymorphisms and haplogroups in Parkinson's disease and control individuals with a similar genetic background *Journal of Human Genetics*. 53 (4): 349-356.
76. Setiawan, V. W., Chu, L. H., John, E. M., Ding, Y. C., Ingles, S. A., Bernstein, L., Press, M. F., Ursin, G., Haiman, C. A., Neuhausen, S. L. (2008) Mitochondrial DNA G10398A variant is not associated with breast cancer in African-American women *Cancer Genetics and Cytogenetics*. 181 (1): 16-19.
77. Kazuno, A. A., Munakata, K., Kato, N., Kato, T. (2008) Mitochondrial DNA-dependent effects of valproate on mitochondrial calcium levels in trans-mitochondrial cybrids *The International Journal of Neuropsychopharmacology*. 11 (1): 71-78.
78. Rai, E., Sharma, S., Koul, A., Bhat, A. K., Bhanwer, A. J., Bamezai, R. N. (2007) Interaction between the UCP2-866G/A, mtDNA 10398G/A and PGC1alpha p.Thr394Thr and p.Gly482Ser polymorphisms in type 2 diabetes susceptibility in North Indian population *Human Genetics*. 122 (5): 535-540.
79. Ross, O. A., McCormack, R., Maxwell, L. D., Duguid, R. A., Quinn, D. J., Barnett, Y. A., Rea, I. M., El-Agnaf, O. M., Gibson, J. M., Wallace, A., Middleton, D., Curran, M. D. (2003) mt4216C variant in linkage with the mtDNA TJ cluster may confer a susceptibility to mitochondrial dysfunction resulting in an increased risk of Parkinson's disease in the Irish *Experimental Gerontology*. 38 (4): 397-405.



80. Liao, W. Q., Pang, Y., Yu, C. A., Wen, J. Y., Zhang, Y. G., Li, X. H. (2008) Novel mutations of mitochondrial DNA associated with type 2 diabetes in Chinese Han population *The Tohoku Journal of Experimental Medicine*. 215 (4): 377-384.
81. Bai, R. K., Leal, S. M., Covarrubias, D., Liu, A., Wong, L. J. (2007) Mitochondrial genetic background modifies breast cancer risk *Cancer Research*. 67 (10): 4687-4694.
82. Huerta, C., Castro, M. G., Coto, E., Blazquez, M., Ribacoba, R., Guisasola, L. M., Salvador, C., Martinez, C., Lahoz, C. H., Alvarez, V. (2005) Mitochondrial DNA polymorphisms and risk of Parkinson's disease in Spanish population *Journal of the Neurological Sciences*. 236 (40545): 49-54.
83. Kazuno, A. A., Munakata, K., Nagai, T., Shimozone, S., Tanaka, M., Yoneda, M., Kato, N., Miyawaki, A., Kato, T. (2006) Identification of mitochondrial DNA polymorphisms that alter mitochondrial matrix pH and intracellular calcium dynamics *PLoS Genetics*. 2 (8): e128.
84. Saxena, R., de Bakker, P. I., Singer, K., Mootha, V., Burt, N., Hirschhorn, J. N., Gaudet, D., Isomaa, B., Daly, M. J., Groop, L., Ardlie, K. G., Altshuler, D. (2006) Comprehensive association testing of common mitochondrial DNA variation in metabolic disease *American Journal of Human Genetics*. 79 (1): 54-61.
85. Niemi, A. K., Moilanen, J. S., Tanaka, M., Hervonen, A., Hurme, M., Lehtimäki, T., Arai, Y., Hirose, N., Majamaa, K. (2005) A combination of three common inherited mitochondrial DNA polymorphisms promotes longevity in Finnish and Japanese subjects *European Journal of Human Genetics*. 13 (2): 166-170.
86. Canter, J. A., Kallianpur, A. R., Parl, F. F., Millikan, R. C. (2005) Mitochondrial DNA G10398A polymorphism and invasive breast cancer in African-American women *Cancer Research*. 65 (17): 8028-8033.
87. Pyle, A., Foltynie, T., Tiangyou, W., Lambert, C., Keers, S. M., Allcock, L. M., Davison, J., Lewis, S. J., Perry, R. H., Barker, R., Burn, D. J., Chinnery, P. F. (2005) Mitochondrial DNA haplogroup cluster UKJT reduces the risk of PD *Annals of Neurology*. 57 (4): 564-567.
88. Ghezzi, D., Marelli, C., Achilli, A., Goldwurm, S., Pezzoli, G., Barone, P., Pellecchia, M. T., Stanzione, P., Brusa, L., Bentivoglio, A. R., Bonuccelli, U., Petrozzi, L., Abbruzzese, G., Marchese, R., Cortelli, P., Grimaldi, D., Martinelli, P., Ferrarese, C., Garavaglia, B., Sangiorgi, S., Carelli, V., Torroni, A., Albanese, A., Zeviani, M. (2005) Mitochondrial DNA haplogroup K is associated with a lower risk of Parkinson's disease in Italians *European Journal of Human Genetics*. 13 (6): 748-752.
89. van der Walt, J. M., Nicodemus, K. K., Martin, E. R., Scott, W. K., Nance, M. A., Watts, R. L., Hubble, J. P., Haines, J. L., Koller, W. C., Lyons, K., Pahwa, R., Stern, M. B., Colcher, A., Hiner, B. C., Jankovic, J., Ondo, W. G., Allen, F. H., Jr., Goetz, C. G., Small, G. W., Mastaglia, F., Stajich, J. M., McLaurin, A. C., Middleton, L. T., Scott, B. L., Schmechel, D. E., Pericak-Vance, M. A., Vance, J. M. (2003) Mitochondrial polymorphisms significantly reduce the risk of Parkinson disease *American Journal of Human Genetics*. 72 (4): 804-811.

#### G15043A

90. Rollins, B., Martin, M. V., Sequeira, P. A., Moon, E. A., Morgan, L. Z., Watson, S. J., Schatzberg, A., Akil, H., Myers, R. M., Jones, E. G., Wallace, D. C., Bunney, W. E., Vawter, M. P. (2009) Mitochondrial variants in schizophrenia, bipolar disorder, and major depressive disorder *PLoS One*. 4 (3): e4913.

91. Saxena, R., de Bakker, P. I., Singer, K., Mootha, V., Burt, N., Hirschhorn, J. N., Gaudet, D., Isomaa, B., Daly, M. J., Groop, L., Ardlie, K. G., Altshuler, D. (2006) Comprehensive association testing of common mitochondrial DNA variation in metabolic disease American Journal of Human Genetics. 79 (1): 54-61.

#### T16093C

92. Wang, Q., Ito, M., Adams, K., Li, B. U., Klopstock, T., Maslim, A., Higashimoto, T., Herzog, J., Boles, R. G. (2004) Mitochondrial DNA control region sequence variation in migraine headache and cyclic vomiting syndrome American Journal of Medical Genetics. 131A (1): 50-58.

#### G16129A

93. Wang, Q., Ito, M., Adams, K., Li, B. U., Klopstock, T., Maslim, A., Higashimoto, T., Herzog, J., Boles, R. G. (2004) Mitochondrial DNA control region sequence variation in migraine headache and cyclic vomiting syndrome American Journal of Medical Genetics. 131A (1): 50-58.

#### A16183C

94. Ebner, S., Lang, R., Mueller, E. E., Eder, W., Oeller, M., Moser, A., Koller, J., Paulweber, B., Mayr, J. A., Sperl, W., Kofler, B. (2011) Mitochondrial haplogroups, control region polymorphisms and malignant melanoma: a study in middle European Caucasians PLoS One. 6 (12): e27192.

#### T16189C

95. Park, K. S., Chan, J. C., Chuang, L. M., Suzuki, S., Araki, E., Nanjo, K., Ji, L., Ng, M., Nishi, M., Furuta, H., Shirotani, T., Ahn, B. Y., Chung, S. S., Min, H. K., Lee, S. W., Kim, J. H., Cho, Y. M., Lee, H. K., Study Group of Molecular Diabetology in, A. (2008) A mitochondrial DNA variant at position 16189 is associated with type 2 diabetes mellitus in Asians Diabetologia. 51 (4): 602-608.
96. Tang, D. L., Zhou, X., Li, X., Zhao, L., Liu, F. (2006) Variation of mitochondrial gene and the association with type 2 diabetes mellitus in a Chinese population Diabetes Research and Clinical Practice. 73 (1): 77-82.
97. Liou, C. W., Lin, T. K., Huei Weng, H., Lee, C. F., Chen, T. L., Wei, Y. H., Chen, S. D., Chuang, Y. C., Weng, S. W., Wang, P. W. (2007) A common mitochondrial DNA variant and increased body mass index as associated factors for development of type 2 diabetes: Additive effects of genetic and environmental factors The Journal of Clinical Endocrinology and Metabolism. 92 (1): 235-239.
98. Ji, L., Gao, L., Han, X. (2001) [Association of 16189 variant (T>C transition) of mitochondrial DNA with genetic predisposition to type 2 diabetes in Chinese populations] Zhonghua Yi Xue Za Zhi. 81 (12): 711-714.
99. Lin, T. K., Chen, S. D., Wang, P. W., Wei, Y. H., Lee, C. F., Chen, T. L., Chuang, Y. C., Tan, T. Y., Chang, K. C., Liou, C. W. (2005) Increased oxidative damage with altered antioxidative status in type 2 diabetic patients harboring the 16189 T to C variant of mitochondrial DNA Annals of the New York Academy of Sciences. 1042 (1): 64-69.
100. Tang, D. L., Zhou, X., Zhou, K. Y., Li, X., Zhao, L., Liu, F., Zheng, F., Liu, S. M. (2005) [Association of mitochondrial DNA variation with type 2 diabetes mellitus] Zhonghua Yi Xue Yi Chuan Xue Za Zhi. 22 (6): 636-640.

101. Das, S., Bennett, A. J., Sovio, U., Ruokonen, A., Martikainen, H., Pouta, A., Hartikainen, A. L., Franks, S., Elliott, P., Poulton, J., Jarvelin, M. R., McCarthy, M. I. (2007) Detailed analysis of variation at and around mitochondrial position 16189 in a large Finnish cohort reveals no significant associations with early growth or metabolic phenotypes at age 31 years *The Journal of Clinical Endocrinology and Metabolism*. 92 (8): 3219-3223.
102. Mueller, E. E., Eder, W., Ebner, S., Schwaiger, E., Santic, D., Kreindl, T., Stanger, O., Paulweber, B., Iglseider, B., Oberkofler, H., Maier, R., Mayr, J. A., Kremppler, F., Weitgasser, R., Patsch, W., Sperl, W., Kofler, B. (2011) The mitochondrial T16189C polymorphism is associated with coronary artery disease in Middle European populations *PLoS One*. 6 (1): e16455.
103. Crispim, D., Fagundes, N. J., Canani, L. H., Gross, J. L., Tschiedel, B., Roisenberg, I. (2006) Role of the mitochondrial m.16189T>C variant in type 2 diabetes mellitus in southern Brazil *Diabetes Research and Clinical Practice*. 74 (2): 204-206.
104. Gill-Randall, R., Sherratt, E. J., Thomas, A. W., Gagg, J. W., Lee, A., Alcolado, J. C. (2001) Analysis of a polycytosine tract and heteroplasmic length variation in the mitochondrial DNA D-loop of patients with diabetes, MELAS syndrome and race-matched controls *Diabetic Medicine*. 18 (5): 413-416.
105. Ebner, S., Lang, R., Mueller, E. E., Eder, W., Oeller, M., Moser, A., Koller, J., Paulweber, B., Mayr, J. A., Sperl, W., Kofler, B. (2011) Mitochondrial haplogroups, control region polymorphisms and malignant melanoma: a study in middle European Caucasians *PLoS One*. 6 (12): e27192.
106. Aral, C., Akkiprik, M., Caglayan, S., Atabey, Z., Ozisik, G., Bekiroglu, N., Ozer, A. (2011) Investigation of relationship of the mitochondrial DNA 16189 T>C polymorphism with metabolic syndrome and its associated clinical parameters in Turkish patients *Hormones (Athens)*. 10 (4): 298-303.
107. Bhat, A., Koul, A., Rai, E., Sharma, S., Dhar, M. K., Bamezai, R. N. (2007) PGC-1alpha Thr394Thr and Gly482Ser variants are significantly associated with T2DM in two North Indian populations: a replicate case-control study *Human Genetics*. 121 (5): 609-614.
108. Bhat, A., Koul, A., Sharma, S., Rai, E., Bukhari, S. I., Dhar, M. K., Bamezai, R. N. (2007) The possible role of 10398A and 16189C mtDNA variants in providing susceptibility to T2DM in two North Indian populations: a replicative study *Human Genetics*. 120 (6): 821-826.
109. Kim, J. H., Park, K. S., Cho, Y. M., Kang, B. S., Kim, S. K., Jeon, H. J., Kim, S. Y., Lee, H. K. (2002) The prevalence of the mitochondrial DNA 16189 variant in non-diabetic Korean adults and its association with higher fasting glucose and body mass index *Diabetic Medicine*. 19 (8): 681-684.
110. Palmieri, V. O., De Rasmo, D., Signorile, A., Sardanelli, A. M., Grattagliano, I., Minerva, F., Cardinale, G., Portincasa, P., Papa, S., Palasciano, G. (2011) T16189C mitochondrial DNA variant is associated with metabolic syndrome in Caucasian subjects *Nutrition*. 27 (7-8): 773-777.
111. Liao, W. Q., Pang, Y., Yu, C. A., Wen, J. Y., Zhang, Y. G., Li, X. H. (2008) Novel mutations of mitochondrial DNA associated with type 2 diabetes in Chinese Han population *The Tohoku Journal of Experimental Medicine*. 215 (4): 377-384.
112. Mohlke, K. L., Jackson, A. U., Scott, L. J., Peck, E. C., Suh, Y. D., Chines, P. S., Watanabe, R. M., Buchanan, T. A., Conneely, K. N., Erdos, M. R., Narisu, N., Enloe,

- S., Valle, T. T., Tuomilehto, J., Bergman, R. N., Boehnke, M., Collins, F. S. (2005) Mitochondrial polymorphisms and susceptibility to type 2 diabetes-related traits in Finns *Human Genetics*. 118 (2): 245-254.
113. Saxena, R., de Bakker, P. I., Singer, K., Mootha, V., Burt, N., Hirschhorn, J. N., Gaudet, D., Isomaa, B., Daly, M. J., Groop, L., Ardlie, K. G., Altshuler, D. (2006) Comprehensive association testing of common mitochondrial DNA variation in metabolic disease *American Journal of Human Genetics*. 79 (1): 54-61.
114. Ye, Z., Gillson, C., Sims, M., Khaw, K. T., Plotka, M., Poulton, J., Langenberg, C., Wareham, N. J. (2013) The association of the mitochondrial DNA OriB variant (16184-16193 polycytosine tract) with type 2 diabetes in European populations *Diabetologia*. 56 (9): 1907-1913.
115. Shaboodien, G., Engel, M. E., Syed, F. F., Poulton, J., Badri, M., Mayosi, B. M. (2009) The mitochondrial DNA T16189C polymorphism and HIV-associated cardiomyopathy: a genotype-phenotype association study *BMC Medical Genetics*. 10 (): 37.
116. Brandon, M., Baldi, P., Wallace, D. C. (2006) Mitochondrial mutations in cancer *Oncogene*. 25 (34): 4647-4662.
117. Weng, S. W., Liou, C. W., Lin, T. K., Wei, Y. H., Lee, C. F., Eng, H. L., Chen, S. D., Liu, R. T., Chen, J. F., Chen, I. Y., Chen, M. H., Wang, P. W. (2005) Association of mitochondrial deoxyribonucleic acid 16189 variant (T>C transition) with metabolic syndrome in Chinese adults *Journal of Clinical Endocrinology and Metabolism*. 90 (9): 5037-5040.
118. Chinnery, P. F., Elliott, H. R., Patel, S., Lambert, C., Keers, S. M., Durham, S. E., McCarthy, M. I., Hitman, G. A., Hattersley, A. T., Walker, M. (2005) Role of the mitochondrial DNA 16184-16193 poly-C tract in type 2 diabetes *Lancet*. 366 (9497): 1650-1651.
119. Liu, V. W., Wang, Y., Yang, H. J., Tsang, P. C., Ng, T. Y., Wong, L. C., Nagley, P., Ngan, H. Y. (2003) Mitochondrial DNA variant 16189T>C is associated with susceptibility to endometrial cancer *Human Mutation*. 22 (2): 173-174.
120. Bannwarth, S., Procaccio, V., Paquis-Flucklinger, V. (2005) Surveyor Nuclease: a new strategy for a rapid identification of heteroplasmic mitochondrial DNA mutations in patients with respiratory chain defects *Human Mutation*. 25 (6): 575-582.
121. Poulton, J., Brown, M. S., Cooper, A., Marchington, D. R., Phillips, D. I. (1998) A common mitochondrial DNA variant is associated with insulin resistance in adult life *Diabetologia*. 41 (1): 54-58.
122. Khogali, S. S., Mayosi, B. M., Beattie, J. M., McKenna, W. J., Watkins, H., Poulton, J. (2001) A common mitochondrial DNA variant associated with susceptibility to dilated cardiomyopathy in two different populations *Lancet*. 357 (9264): 1265-1267.
123. Poulton, J., Bednarz, A. L., Scott-Brown, M., Thompson, C., Macaulay, V. A., Simmons, D. (2002) The presence of a common mitochondrial DNA variant is associated with fasting insulin levels in Europeans in Auckland *Diabetic Medicine*. 19 (11): 969-971.
124. Poulton, J., Luan, J., Macaulay, V., Hennings, S., Mitchell, J., Wareham, N. J. (2002) Type 2 diabetes is associated with a common mitochondrial variant: evidence from a population-based case-control study *Human Molecular Genetics*. 11 (13): 1581-1583.

125. Poulton, J. (1998) Does a common mitochondrial DNA polymorphism underlie susceptibility to diabetes and the thrifty genotype? *Trends in Genetics*. 14 (10): 387-389.

T16519C

126. Fliss, M. S., Usadel, H., Caballero, O. L., Wu, L., Buta, M. R., Eleff, S. M., Jen, J., Sidransky, D. (2000) Facile detection of mitochondrial DNA mutations in tumors and bodily fluids *Science* . 287 (5460): 2017-2019 .
127. Chen, J. Z., Gokden, N., Greene, G. F., Mukunyadzi, P., Kadlubar, F. F. (2002) Extensive somatic mitochondrial mutations in primary prostate cancer using laser capture microdissection *Cancer Research* . 62 (22): 6470-6474 .
128. Wu, C. W., Yin, P. H., Hung, W. Y., Li, A. F., Li, S. H., Chi, C. W., Wei, Y. H., Lee, H. C. (2005) Mitochondrial DNA mutations and mitochondrial DNA depletion in gastric cancer *Genes, Chromosomes and Cancer* . 44 (1): 19-28 .
129. Kirches, E., Krause, G., Warich-Kirches, M., Weis, S., Schneider, T., Meyer-Puttlitz, B., Mawrin, C., Dietzmann, K. (2001) High frequency of mitochondrial DNA mutations in glioblastoma multiforme identified by direct sequence comparison to blood samples *International Journal of Cancer* . 93 (4): 534-538 .
130. Brandon, M., Baldi, P., Wallace, D. C. (2006) Mitochondrial mutations in cancer *Oncogene* . 25 (34): 4647-4662 .
131. Bragoszewski, P., Kupryjanczyk, J., Bartnik, E., Rachinger, A., Ostrowski, J. (2008) Limited clinical relevance of mitochondrial DNA mutation and gene expression analyses in ovarian cancer *BMC Cancer* . 8 (-): 292.
